# Supplementary material for: Insertion and isomerisation of internal olefins at alkylaluminium hydride: catalysis with zirconocene dichloride
Source: Royal Society of Chemistry journal article supplement (doi:10.1039/c5dt03257a), 2015-01-01
Supplement: c5dt03257a1.pdf [file c5dt03257a1.pdf]

### Supplementary Information

## Insertion and isomerisation of internal olefins at alkylaluminium hydride: catalysis with zirconocene dichloride

Nandita M. Weliange,<sup>a</sup> David S. McGuinness,<sup>\*a</sup> Michael G. Gardiner<sup>a</sup> and Jim Patel<sup>b</sup>

<sup>a</sup> School of Physical Sciences – Chemistry, Private Bag 75, Hobart 7001, Australia. Email: david.mcguinness@utas.edu.au

<sup>b</sup> CSIRO Energy, 71 Normanby Rd, Clayton North 3169, Australia.

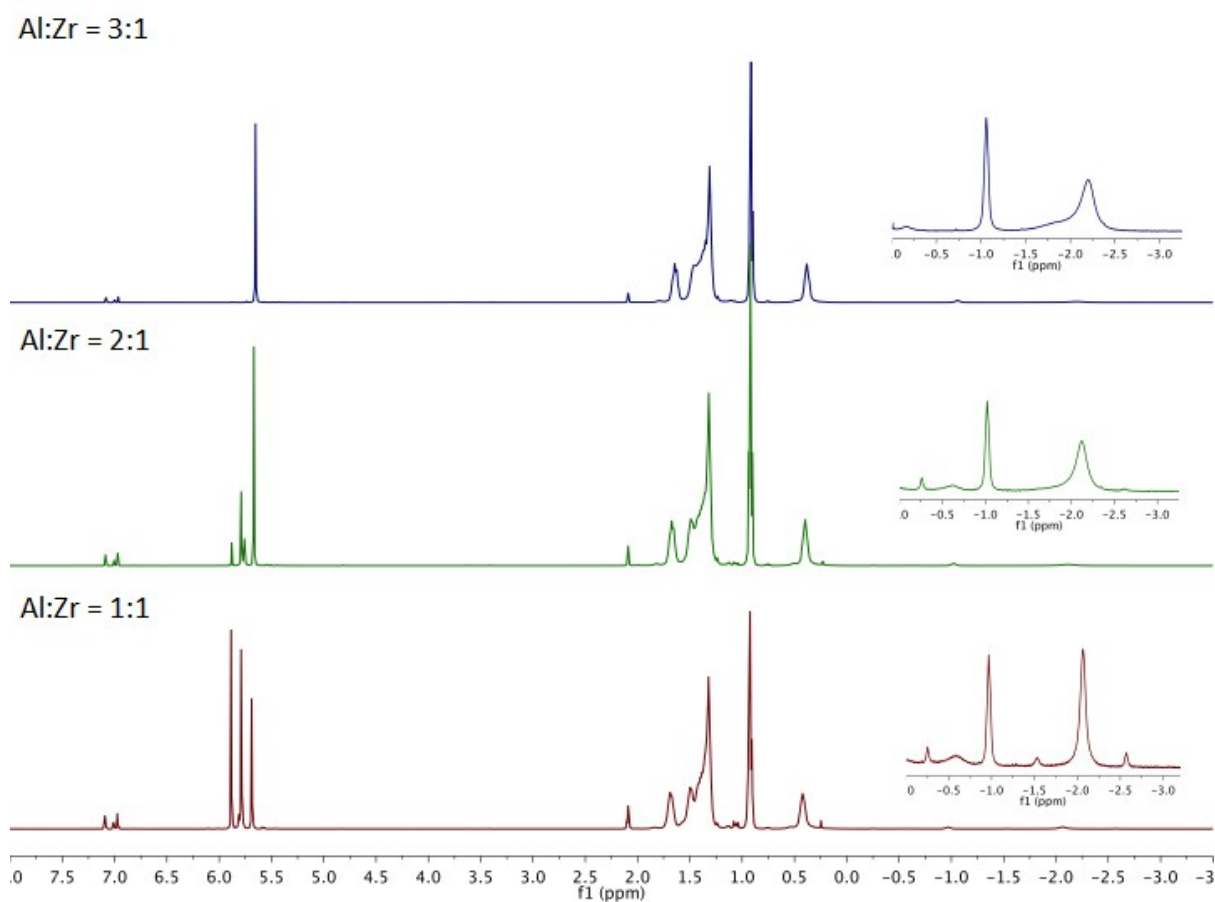

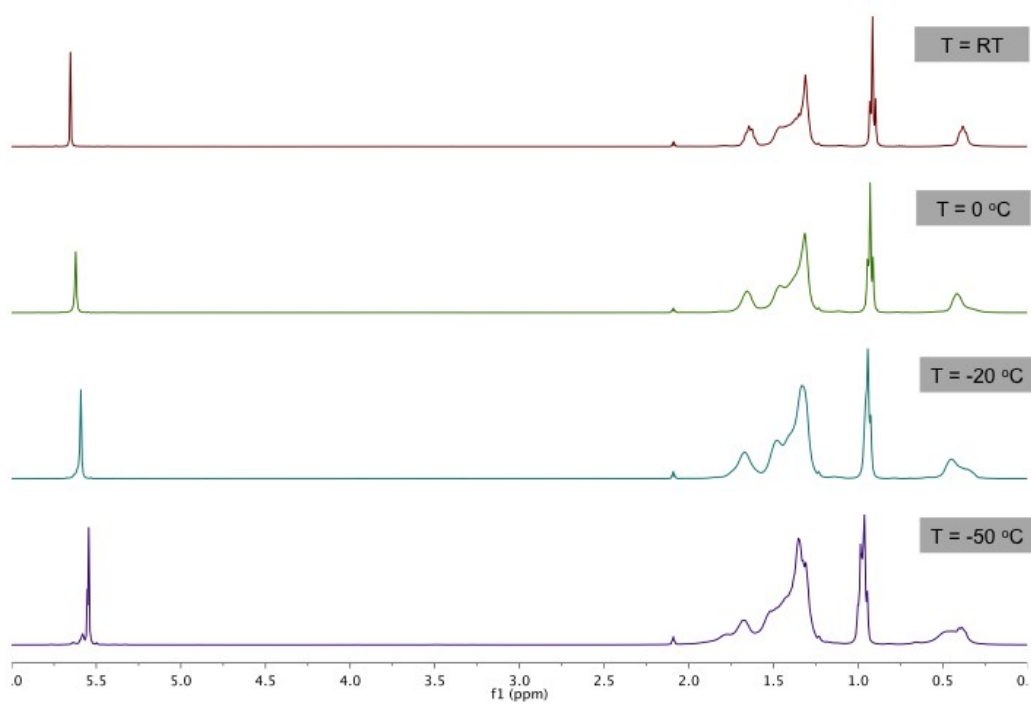

Figure S2. VT <sup>1</sup>H NMR spectroscopy of  $[\text{Cp}_2\text{ZrCl}_2] + 3 [\text{Al}(\text{Oct})_2\text{H}]$  in  $\text{toluene-d}_8$ .

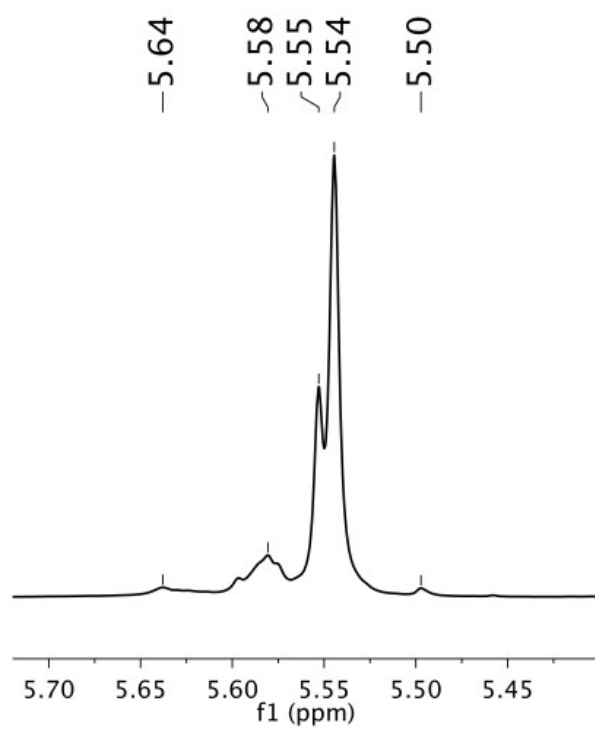

Figure S3. <sup>1</sup>H NMR spectrum of  $[\text{Cp}_2\text{ZrCl}_2] + 3 [\text{Al}(\text{Oct})_2\text{H}]$  in the cyclopentadienylH region (-50 °C,  $\text{toluene-d}_8$ ).

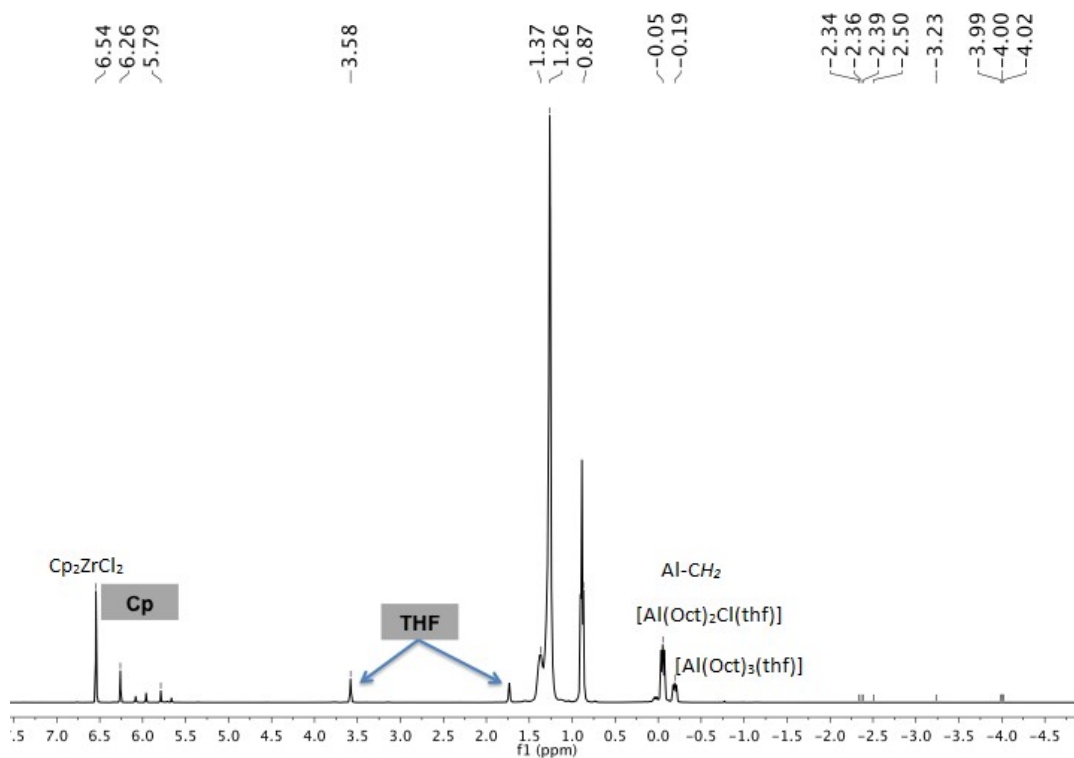

Figure S4. <sup>1</sup>H NMR spectrum of [Cp<sub>2</sub>ZrCl<sub>2</sub>] + [Al(Oct)<sub>2</sub>H] (1:1) in THF-d<sub>8</sub> (-50 °C).

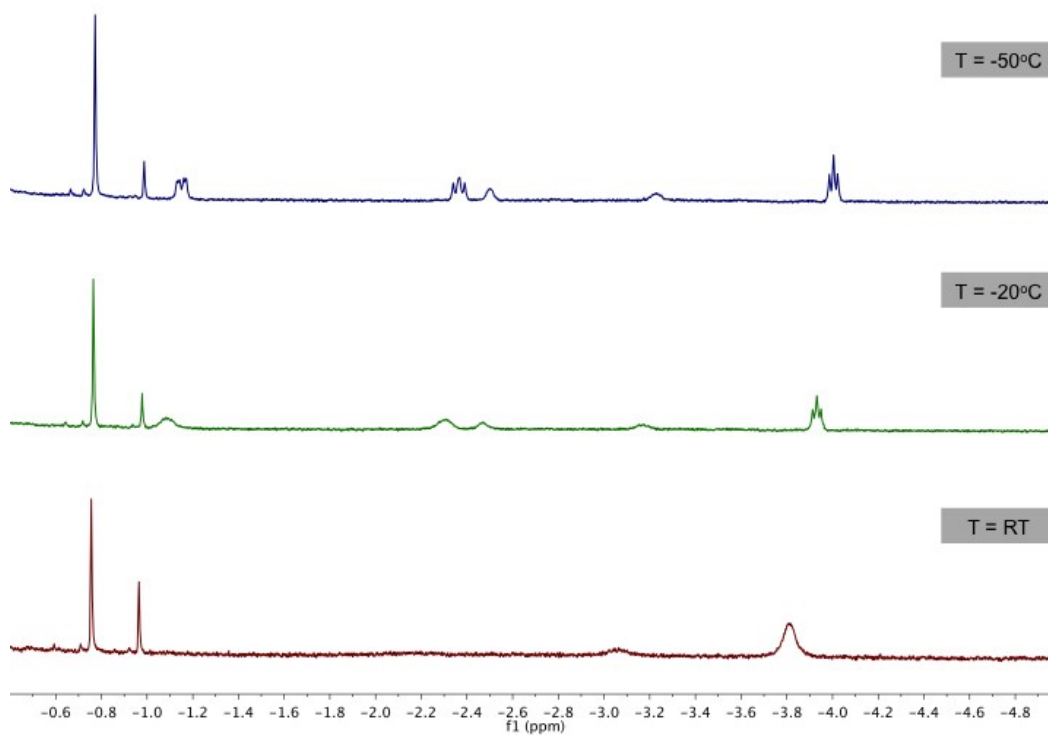

Figure S5. VT <sup>1</sup>H NMR spectroscopy of [Cp<sub>2</sub>ZrCl<sub>2</sub>] + [Al(Oct)<sub>2</sub>H] (1:1) in the Zr-hydride region (THF-d<sub>8</sub>).

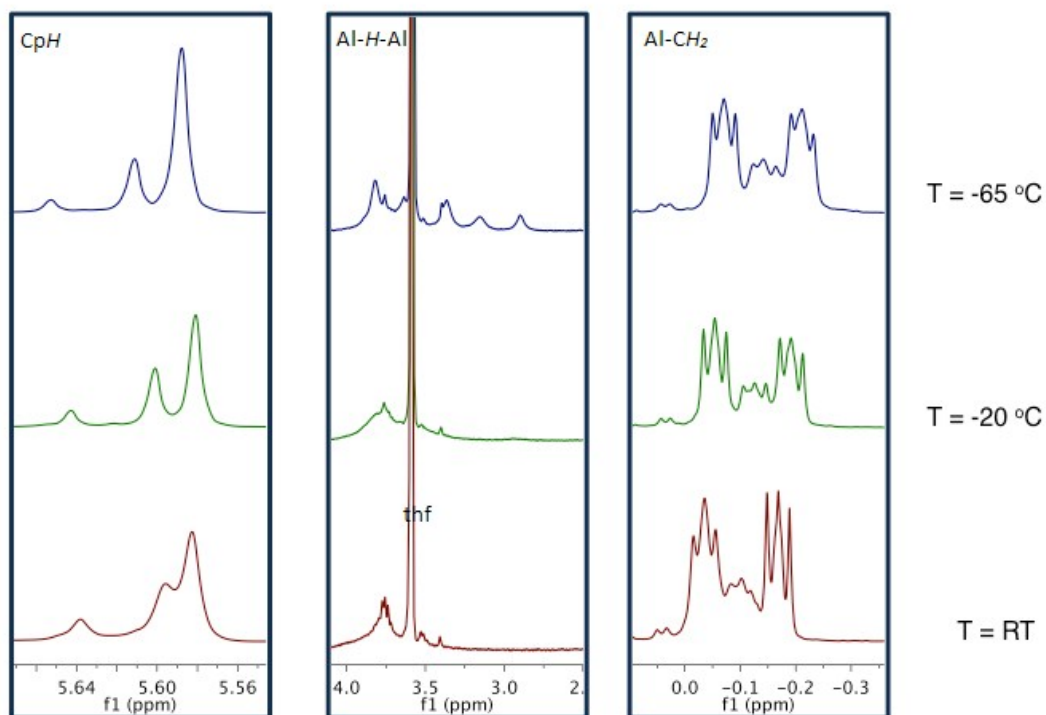

Figure S6. VT <sup>1</sup>H NMR spectroscopy of [Cp<sub>2</sub>ZrCl<sub>2</sub>] + [Al(Oct)<sub>2</sub>H] (1:3) in the CpH, Al-H-Al and AlCH<sub>2</sub> regions (THF-d<sub>8</sub>).

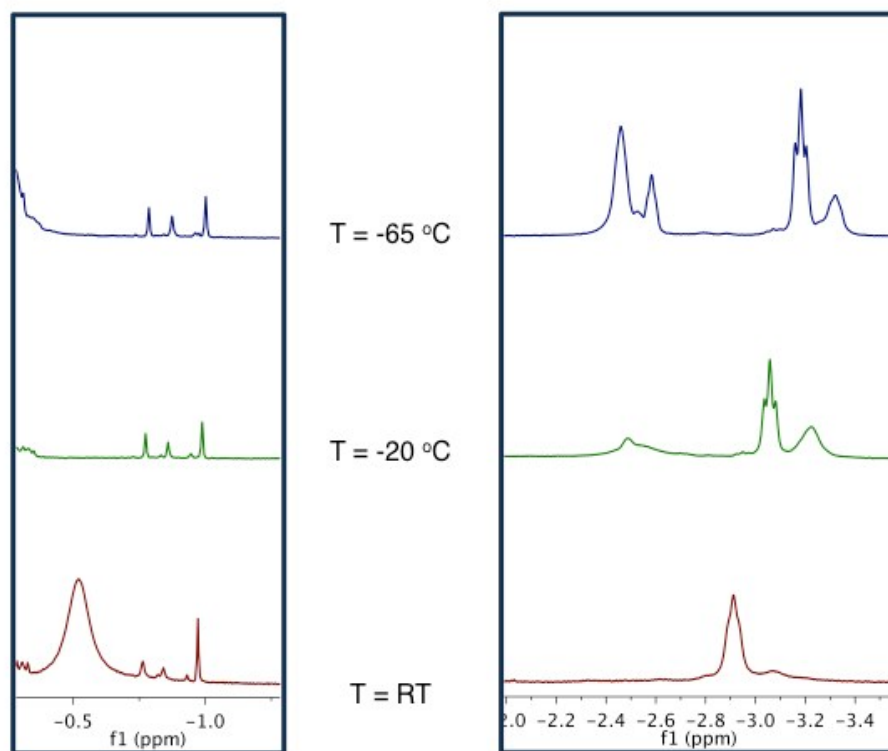

Figure S7. VT <sup>1</sup>H NMR spectroscopy of [Cp<sub>2</sub>ZrCl<sub>2</sub>] + [Al(Oct)<sub>2</sub>H] (1:3) in the Zr-H region (THF-d<sub>8</sub>).

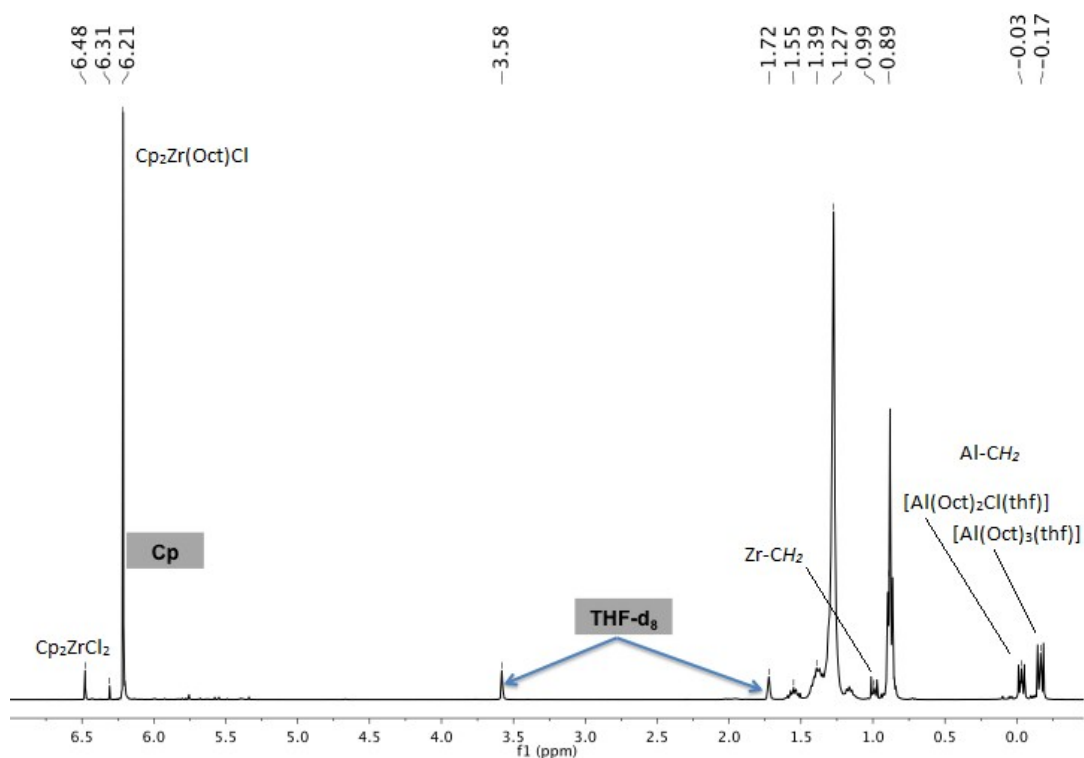

Figure S8. <sup>1</sup>H NMR spectrum from the reaction of [Cp<sub>2</sub>ZrCl<sub>2</sub>] / [Al(Oct)<sub>2</sub>H] / 1-octene (1:1:1) in THF-d<sub>8</sub>.

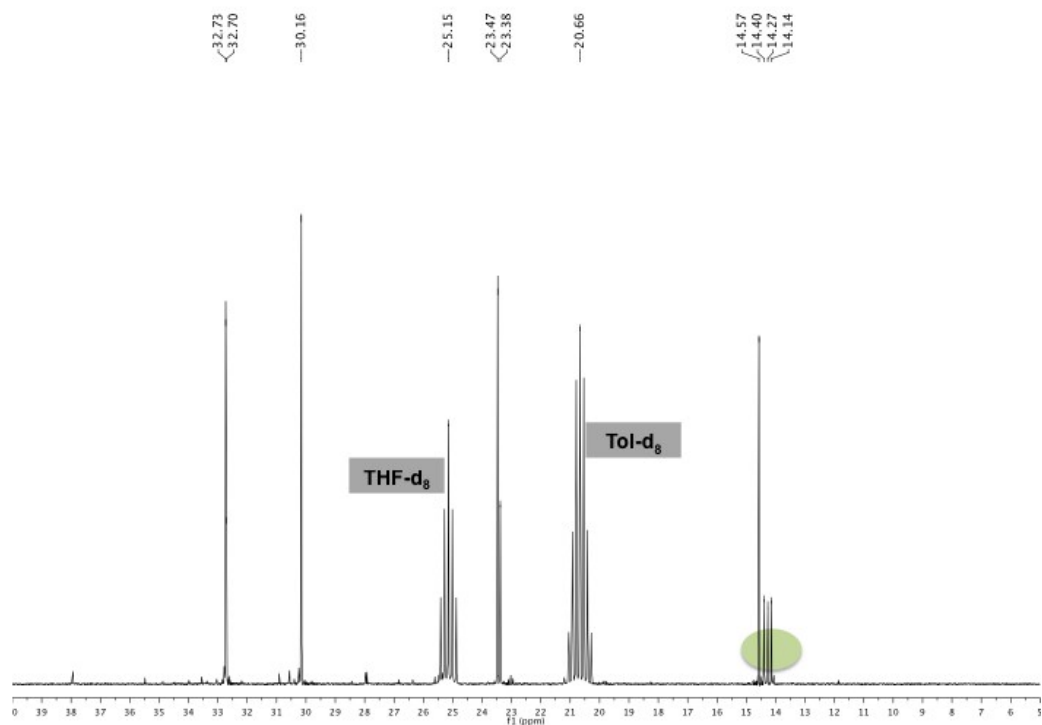

Figure S9. <sup>13</sup>C NMR of 1-d<sub>1</sub>-*n*-octane obtained by quenching the [Cp<sub>2</sub>ZrCl<sub>2</sub>]/[Al(Oct)<sub>2</sub>H]/internal octene reaction mixture with D<sub>2</sub>O (reaction solvent THF-d<sub>8</sub>, extracted into toluene-d<sub>8</sub> following D<sub>2</sub>O quench).

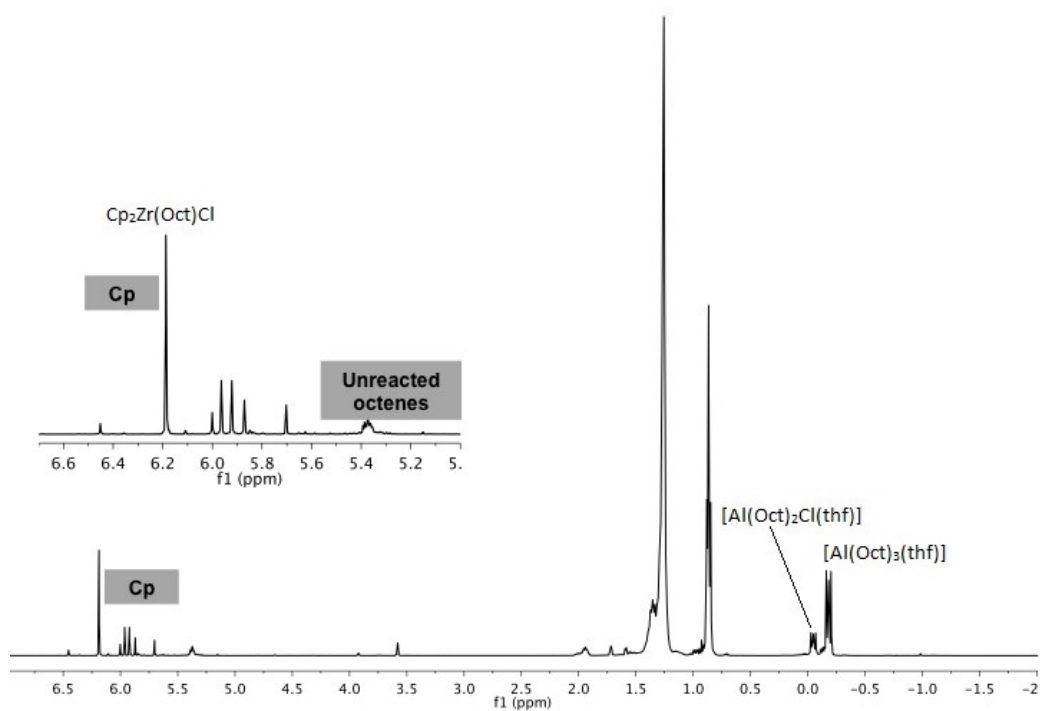

Figure S10.  $^1\text{H}$  NMR following reaction (40  $^\circ\text{C}$ , 96 hr) of internal octenes with  $[\text{Cp}_2\text{ZrCl}_2]$  and  $[\text{Al}(\text{Oct})_2\text{H}]$  in  $\text{THF-d}_8$  (octene : Al-H : Zr = 4:4:1).

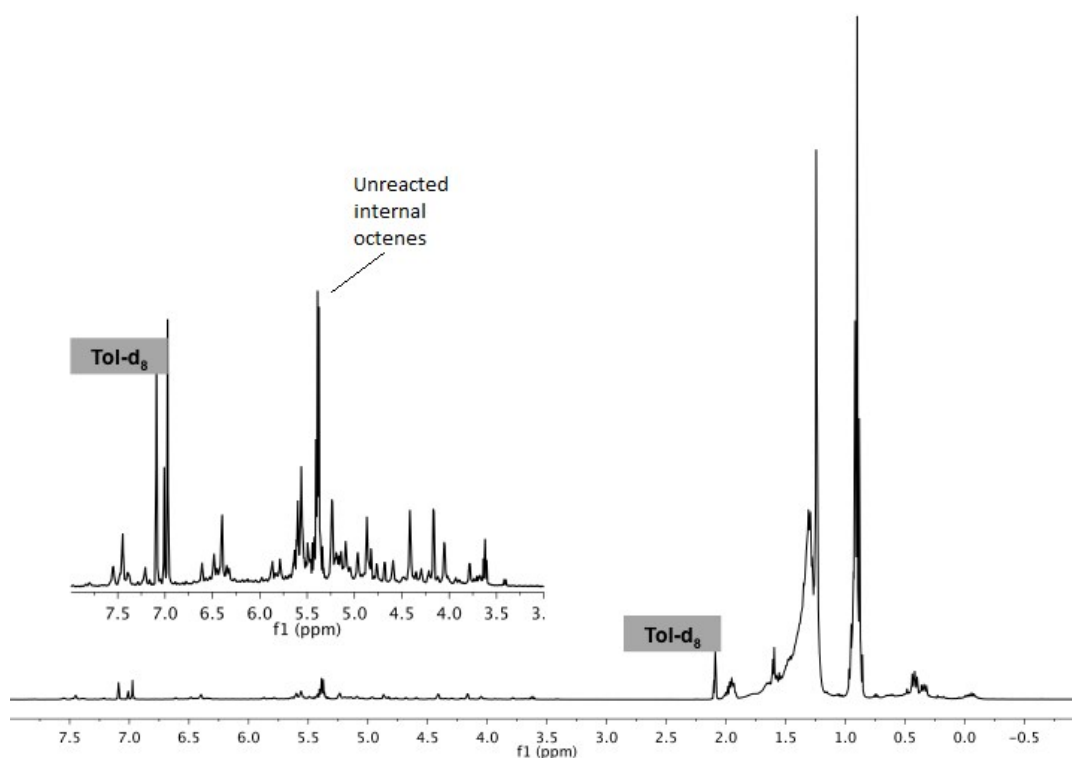

Figure S11.  $^1\text{H}$  NMR following reaction (80  $^\circ\text{C}$ , 3 days) of internal octenes with  $[\text{Cp}_2\text{ZrCl}_2]$  and  $[\text{Al}(\text{Oct})_2\text{H}]$  in  $\text{toluene-d}_8$  (octene : Al-H : Zr = 1:1:1).

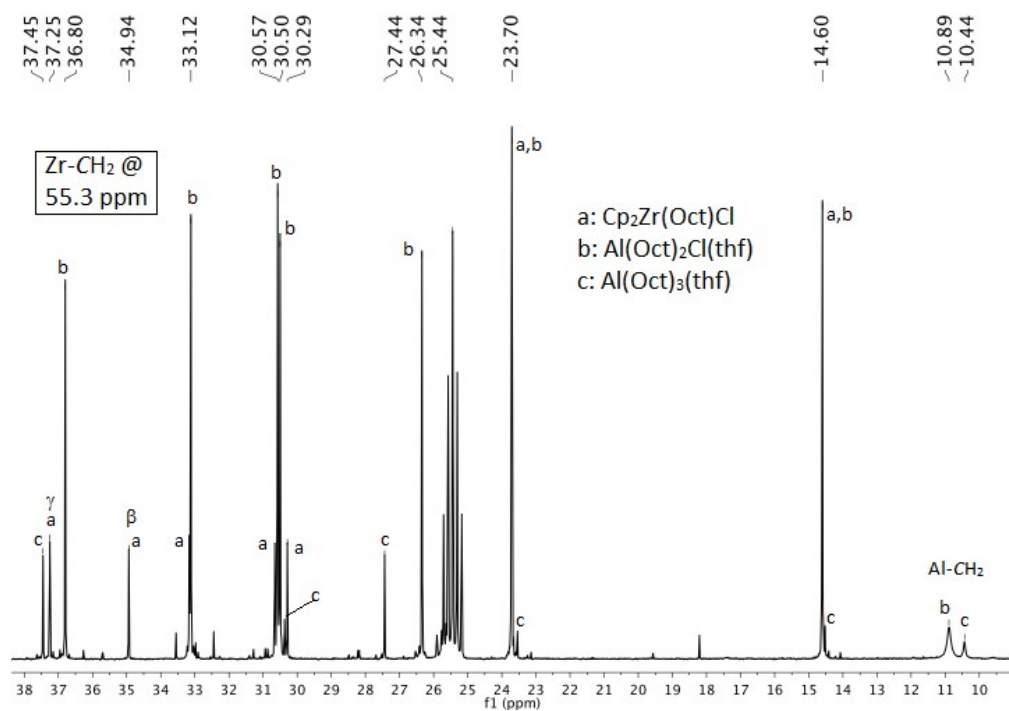

Figure S12. <sup>13</sup>C NMR spectrum from the reaction of [Cp<sub>2</sub>ZrCl<sub>2</sub>] / [Al(Oct)<sub>2</sub>H] / 1-octene (1:1:1) in THF-d<sub>8</sub>.

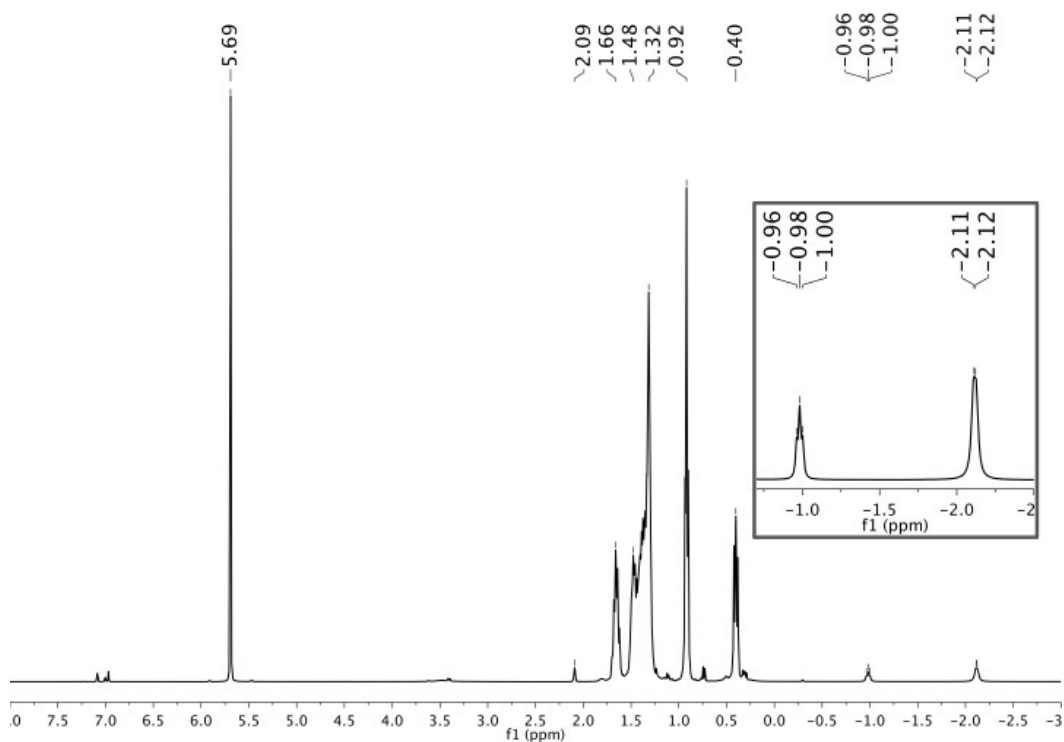

Figure S13. <sup>1</sup>H NMR spectrum of complex **4**, prepared by reacting [Cp<sub>2</sub>ZrCl<sub>2</sub>] with 3 equivalents of [Al(Oct)<sub>2</sub>H] in toluene-d<sub>8</sub>.

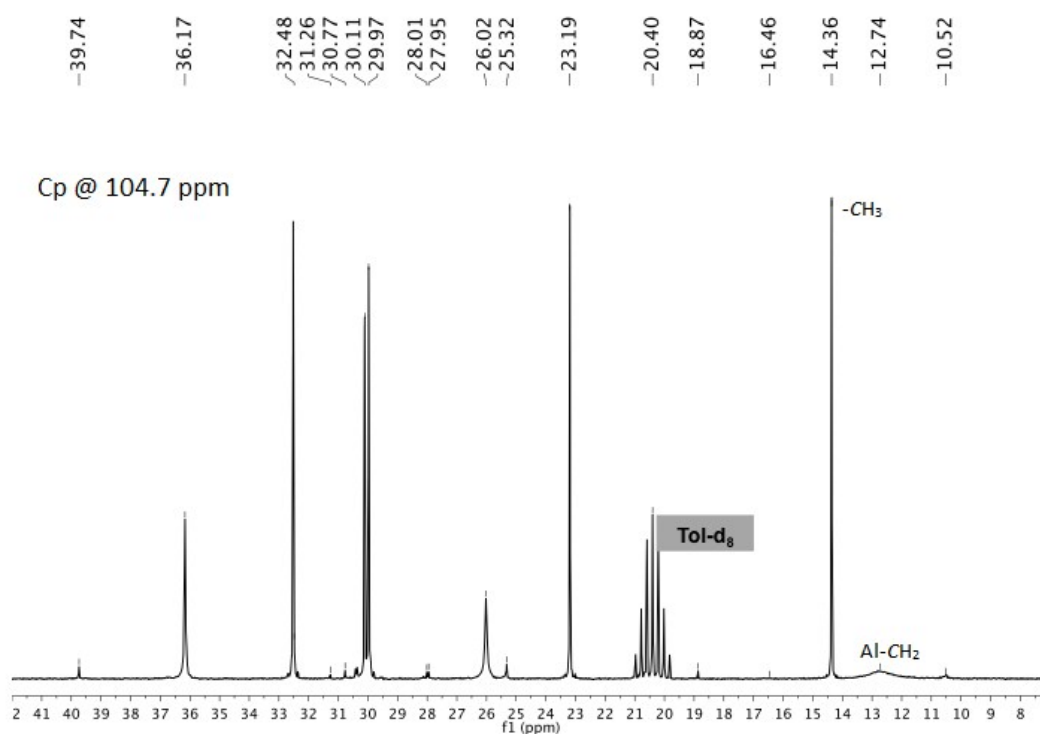

Figure S14.  $^{13}\text{C}$  NMR spectrum of complex **4**, prepared by reacting  $[\text{Cp}_2\text{ZrCl}_2]$  with 3 equivalents of  $[\text{Al}(\text{Oct})_2\text{H}]$  in toluene- $\text{d}_8$ .

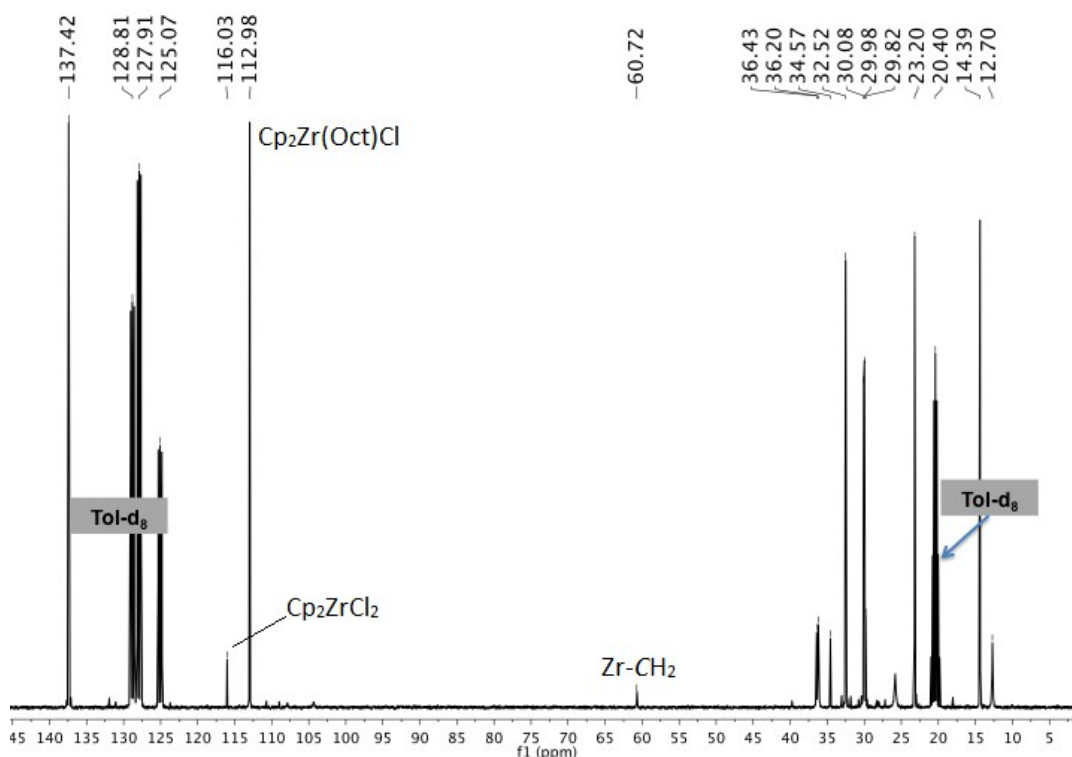

Figure S15.  $^{13}\text{C}$  NMR spectrum from the reaction of  $[\text{Cp}_2\text{ZrCl}_2]$  /  $[\text{Al}(\text{Oct})_2\text{H}]$  / 1-octene (1:1:1) in Toluene- $\text{d}_8$ .



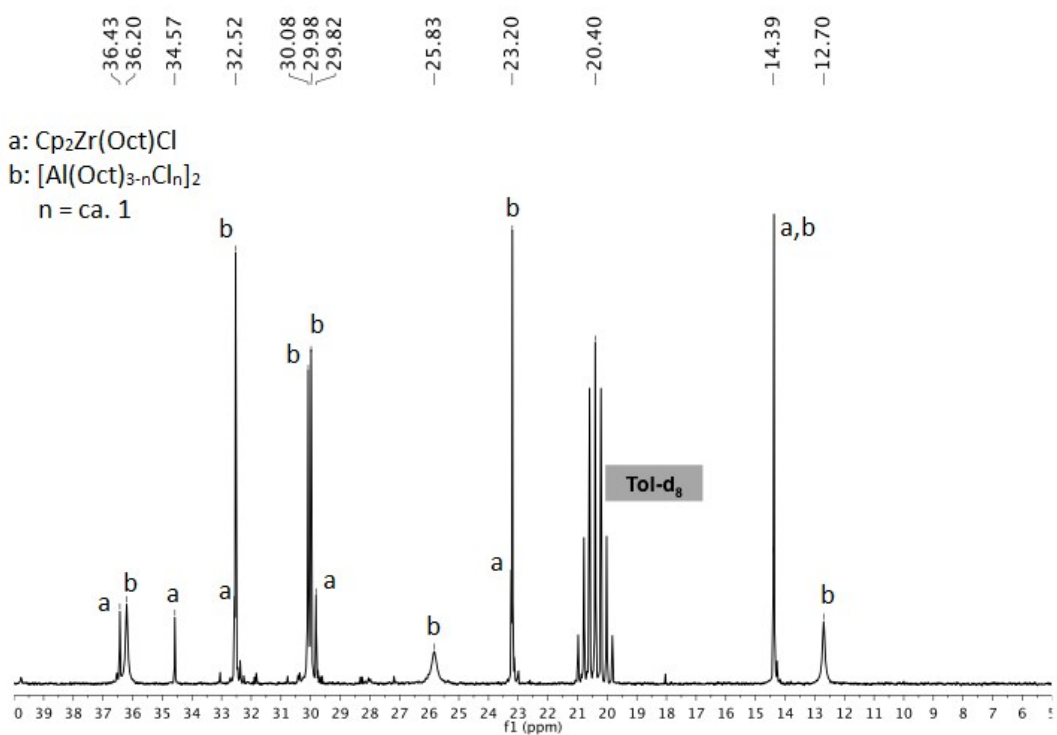

Figure S16. <sup>13</sup>C NMR spectrum from the reaction of [Cp<sub>2</sub>ZrCl<sub>2</sub>] / [Al(Oct)<sub>2</sub>H] / 1-octene (1:1:1) in Toluene-d<sub>8</sub> (*n*-alkyl region).

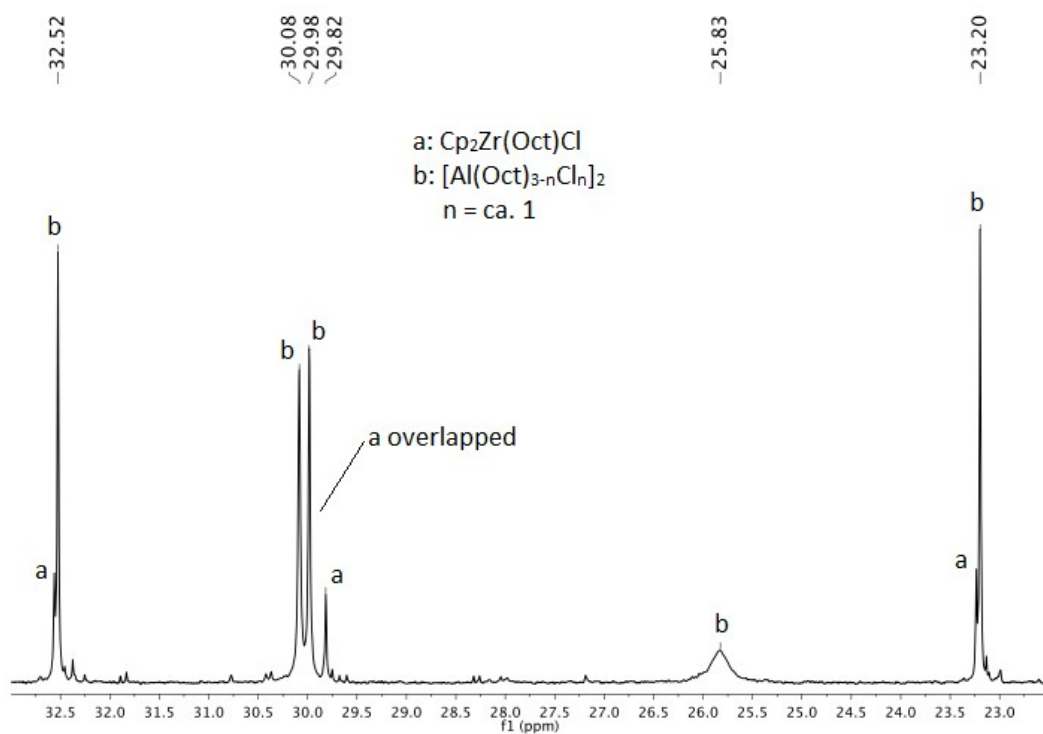

Figure S17. <sup>13</sup>C NMR spectrum from the reaction of [Cp<sub>2</sub>ZrCl<sub>2</sub>] / [Al(Oct)<sub>2</sub>H] / 1-octene (1:1:1) in Toluene-d<sub>8</sub> (expansion of *n*-alkyl region).

## Theoretical $^1\text{H}$ NMR shielding values

The theoretical  $^1\text{H}$  NMR shielding values for complexes **4**, **6–8** ( $R = n\text{-Pr}$ ) and two other complexes,  $[\text{Cp}_2\text{Zr}(\text{H})(\mu\text{-Cl},\text{H})\text{AlPr}_2]$  and  $[\text{Cp}_2\text{Zr}(\text{Cl})(\mu\text{-H})_2\text{AlPr}_2]$ , were calculated with the GIAO-DFT<sup>1</sup> method. The  $n$ -octyl groups were replaced with  $n$ -propyl and calculations were performed at the B3LYP/BS2//M06/BS1 level of theory (the B3LYP functional was employed to calculate shielding values in order to maintain consistency with our previous NMR calculations on Al-hydride clusters<sup>2</sup>). Chemical shifts were obtained by referencing to the calculated shielding value for tetramethylsilane.

The calculated shifts for each complex are illustrated in Figure S18. Complex **4** is predicted to lead to signals at -2.0 ppm for the two outer hydrides and -1.0 ppm for the inner hydride. This is in reasonable agreement with the measured  $^1\text{H}$  NMR spectrum for **4** ( $R = \text{octyl}$ , Figure 1 main article). Complex **6** optimised to a structure with two bridging hydrides and one terminal Zr–hydride. We have not seen evidence for a hydride signal around 1.0 ppm as predicted, although such a signal could be easily masked by the large alkyl group resonances. Furthermore, the calculated NMR shifts reflect a static situation, whereas in solution dynamic exchange of the hydrides is possible. The bridging hydrides for **6** are more consistent with experimental observations. As such, it is possible that a structure such as **6** could give rise to a hydride signal in the region between -1.0 to -2.5 ppm as observed experimentally. Complex **7** optimised to a structure in which the chloro ligand is not interacting with zirconium. Both **7** and **8** are predicted to lead to Zr–H–Zr signals at ca. -4 ppm. There are no experimentally observed signals this far upfield, which may indicate that structures with Zr–H–Zr bridging are not present. The chemical shifts predicted for  $[\text{Cp}_2\text{Zr}(\text{H})(\mu\text{-Cl},\text{H})\text{AlPr}_2]$  and  $[\text{Cp}_2\text{Zr}(\text{Cl})(\mu\text{-H})_2\text{AlPr}_2]$  appear to be too far downfield to account for the additional hydride signals observed.

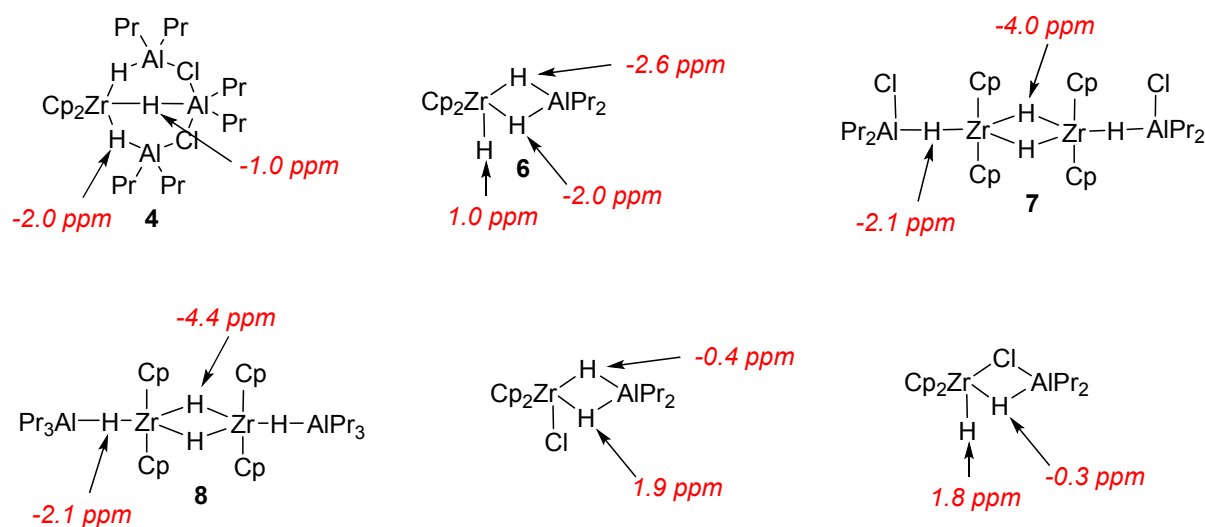

Figure S18. Calculated (B3LYP/BS2//M06/BS1)  $^1\text{H}$  NMR chemical shifts for putative Zr/Al hydride clusters (relative to tetramethylsilane).

<sup>1</sup> (a) J. R. Cheeseman; G. W. Trucks; T. A. Keith; M. J. Frisch, *J. Chem. Phys.* **1996**, *104*, 5497; (b) K. Wolinski; J. F. Hinton; P. Pulay, *J. Am. Chem. Soc.* **1990**, *112*, 8251.

<sup>2</sup> N. M. Weljange; D. S. McGuinness; M. G. Gardiner; J. Patel, *Dalton Trans.* **2015**, *44*, 15286.

## THF coordination to Zr/Al hydride clusters

As discussed in the text, a rationale for trying the reaction in THF was that coordinating solvents might break up the stable Zr/Al hydride cluster(s). It appears however that such clusters persist in THF, albeit they are more reactive towards olefin. The thermodynamics of THF coordination to such clusters has been approximated by calculating the reaction free energy of the following reaction:

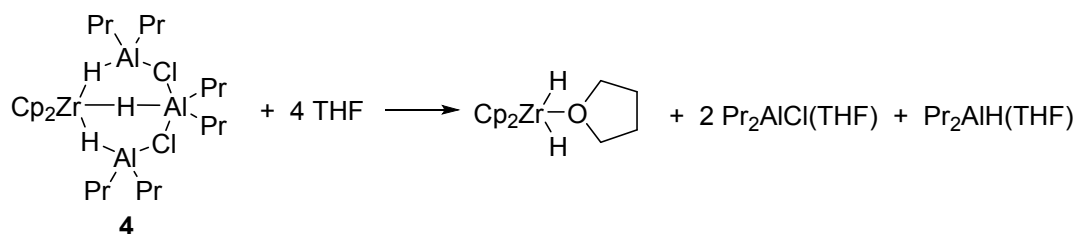

There are two isomers of Cp<sub>2</sub>ZrH<sub>2</sub>(THF), with THF between the hydride ligands (most stable) and with the two hydrides adjacent to one another. The calculated free energy (M06/BS2//M06/BS1) for each reaction is 79 kJ·mol<sup>-1</sup> and 99 kJ·mol<sup>-1</sup> respectively. This would seemingly indicate that hydride bridged Zr/Al clusters are quite stable and will not be easily broken apart by additional ligation.

## Spin states of binuclear Zr complexes

For the binuclear (Zr·····Zr) complexes postulated herein a number of spin states can be computed, these being a closed shell singlet (css), a triplet, and an open shell singlet (oss, a biradical where each Zr centre has one unpaired electron of opposite spin). The relative energies of these spin states that are indicated in the text are those resulting from use of the M06 functional (27% HF exchange). It is well known that different density functionals lead to differing predictions for relative spin state energies in transition metals, with one of the main factors being the amount of HF exchange included in hybrid functionals. Harvey's studies have suggested hybrid functionals with around 15% HF exchange may be most appropriate for comparing spin state splittings.<sup>3</sup> It is found that high amounts of HF exchange lead to an overestabilisation of the high spin states, which in this work correspond to the triplet and oss.

A related issue raised by a referee is that biradicals such as the oss exhibit significant multi-reference character and as such DFT may not lead to accurate energies for such species. This is a valid point, and the applicability of UDFT methods to oss biradicals has been studied.<sup>4</sup> In cases where the single electrons are located at different centres (as is the present case), the errors can be small. In complex **10**, the  $\langle S^2 \rangle$  values for the oss before (0.972) and after (0.091) annihilation of the first spin contaminant indicate contamination of the singlet is predominately from the triplet state. In this case it is possible to obtain a spin corrected energy for the oss, as proposed by Yamaguchi.<sup>5</sup> This value for the energy of oss **10** is included below, although as the energies of the triplet and uncorrected oss are very similar, it leads to very little change in the relative energies.

<sup>3</sup> J. N. Harvey, in *Principles and Applications of Density Functional Theory in Inorganic Chemistry I, Structure and Bonding* (Eds N. Kaltsoyannis, J. E. McGrady) **2004**, Vol. 112, pp. 151–184 (Springer: Berlin).

<sup>4</sup> See for instance: J. Gräfenstein; E. Kraka; M. Filatov; D. Cremer, *Int. J. Mol. Sci.* **2002**, *3*, 360, and references therein.

<sup>5</sup> K. Yamaguchi; F. Jensen; A. Dorigo; K. N. Houk, *Chem. Phys. Lett.* **1988**, *149*, 537.

The use of DFT methods for systems with multi-configurational character has been extensively discussed, and we refer to the papers of Truhlar and references therein.<sup>6</sup> The general conclusions from previous work are that the correct choice of functional can yield accurate results even with multi-reference character. For such systems, non-hybrid (local) methods appear to be more robust than hybrid functionals.

With the above considerations in mind, we have evaluated the energies of complexes **10** and **11** with a variety of different density functionals, both local and hybrid (DF/BS2//DF/BS1). The results are presented in Table S1. The M06L functional was included (0% HF) for comparison to M06 (29% HF), and noting that this functional has been reported to perform well for transition metal systems.<sup>7</sup> The BLYP, B1LYP and BHandHLYP functionals include 0%, 25% and 50% HF exchange respectively. Furthermore, Truhlar<sup>6b</sup> has demonstrated the accuracy of BLYP for transition metal dimers, including Zr<sub>2</sub>. For complex **10** M06, M06L and BLYP lead to very similar relative energies. At the other extreme, BHandHLYP predicts the triplet and oss are lower in energy than the css. Given that high amounts of HF exchange is known to overestimate the stability of high spin states, and leads to poor results in multi-reference systems, these values are probably unreliable. The B1LYP functional leads to relative energies between M06(L)/BLYP and BHandHLYP. It can be seen that inclusion of spin correction to the oss **10** leads to only a minor stabilisation of this state.

**Table S1.** Relative free energies (DF/BS2//DF/BS1, kJ·mol<sup>-1</sup>, 298 K) for different spin states of complexes **10** and **11**.<sup>a</sup>

| Spin state                                                | M06 | M06 <sub>sc</sub> <sup>b</sup> | M06L | BLYP | B1LYP | BHandHLYP |
|-----------------------------------------------------------|-----|--------------------------------|------|------|-------|-----------|
| [Cp <sub>2</sub> Zr(μ-Pr,Cl)ZrCp <sub>2</sub> ] <b>10</b> |     |                                |      |      |       |           |
| css                                                       | 0   | 0                              | 0    | 0    | 0     | 0         |
| oss                                                       | 21  | 19                             | 24   | 21   | -5    | -35       |
| triplet                                                   | 22  | 22                             | 23   | 22   | -5    | -36       |
| [Cp <sub>2</sub> Zr] <sub>2</sub> <b>11</b>               |     |                                |      |      |       |           |
| css                                                       | 0   |                                | 0    | 0    |       |           |
| oss                                                       | -30 |                                | -27  | -12  |       |           |
| triplet                                                   | -34 |                                | -27  | -10  |       |           |

<sup>a</sup> free energies relative to the css in each case. <sup>b</sup> After spin correction to the energy of the oss, see text.

For complex **11** the high spin states are more stable, even with local functionals. Again the M06 and M06L values are very similar, while BLYP predicts the different spin states are closer in energy. It can be noted in all cases that the triplet and oss are very close in energy. Given the uncertainty in which of these is more stable, the free energy surface shown in Figure 3 has only been calculated with css and triplet species and corresponding MECPs.

While benchmarking of these DFT results would be desirable, this is a non-trivial task. The binuclear complexes are not easily simplified, as the cyclopentadienyl ligand cannot be replaced with realistic smaller models, and at any rate are non-innocent in the reaction. In particular, accurately assessing the spin state splitting between the triplet and oss would likely require very high levels of theory. For this reason we instead draw on the work of Truhlar which shows that local density

<sup>6</sup> (a) N. E. Schultz; Y. Zhao; D. G. Truhlar, *J. Phys. Chem. A* **2005**, *109*, 11127; (b) N. E. Schultz; Y. Zhao; D. G. Truhlar, *J. Phys. Chem. A* **2005**, *109*, 4388; (c) C. J. Cramer; D. G. Truhlar, *Phys. Chem. Chem. Phys.* **2009**, *11*, 10757; (d) Y. Zhao; O. Tishchenko; J. R. Gour; W. Li; J. J. Lutz; P. Piecuch; D. G. Truhlar, *J. Phys. Chem. A* **2009**, *113*, 5786.

<sup>7</sup> D. G. Gusev, *Organometallics* **2013**, *32*, 4239.

functionals like BLYP perform well for binuclear Zr.<sup>6b</sup> The observation that the M06 functional used throughout is in reasonably good agreement with BLYP and M06L is encouraging.

The goal of the theoretical studies in the present work was to show that reductive elimination from mononuclear Zr-dialkyls and alkylhydrides is favourable, leading to more stable products. Despite the uncertainty in ground spin states of the dimers, this theory seems to show that reductive elimination would lead to such complexes. An accurate assessment of spin state energies for such species would be the subject of a much more demanding theoretical study.

### Optimised geometries and energies (Hartrees) of all stationary points

#### Propene

M06/BS1:

```

E(RM06) = -117.799195084
Zero-point correction=          0.079553 (Hartree/Particle)
Thermal correction to Energy=    0.083638
Thermal correction to Enthalpy=  0.084582
Thermal correction to Gibbs Free Energy= 0.054580
Sum of electronic and zero-point Energies= -117.719642
Sum of electronic and thermal Energies= -117.715557
Sum of electronic and thermal Enthalpies= -117.714613
Sum of electronic and thermal Free Energies= -117.744615
E(RM06/BS2) = -117.836559676

```

|   |             |             |             |
|---|-------------|-------------|-------------|
| C | -1.34753600 | 0.08138600  | -0.16528800 |
| H | -0.89321800 | -0.81668100 | -0.58600600 |
| H | -2.42834500 | 0.06665000  | -0.04010900 |
| C | -0.61200200 | 1.13536500  | 0.17547400  |
| H | -1.10892200 | 2.01417400  | 0.59455100  |
| C | 0.87034300  | 1.22083700  | 0.03205800  |
| H | 1.16388000  | 2.05938600  | -0.61493300 |
| H | 1.35817400  | 1.39000700  | 1.00245900  |
| H | 1.28276700  | 0.29963100  | -0.39820700 |

#### Propane

M06/BS1:

```

E(RM06) = -119.032431946
Zero-point correction=          0.103365 (Hartree/Particle)
Thermal correction to Energy=    0.107902
Thermal correction to Enthalpy=  0.108846
Thermal correction to Gibbs Free Energy= 0.077703
Sum of electronic and zero-point Energies= -118.929066
Sum of electronic and thermal Energies= -118.924530
Sum of electronic and thermal Enthalpies= -118.923586
Sum of electronic and thermal Free Energies= -118.954729
E(RM06/BS2) = -119.068818876

```

|   |             |             |             |
|---|-------------|-------------|-------------|
| C | -1.45930100 | 1.94885500  | -0.00025400 |
| H | -1.11232400 | 2.50152400  | 0.88423600  |
| H | -1.11259300 | 2.50080700  | -0.88529600 |
| H | -2.55611600 | 1.97526200  | -0.00009600 |
| C | -0.92032500 | 0.52738200  | 0.00022100  |
| H | -1.30321300 | -0.01374400 | 0.87854400  |
| H | -1.30340600 | -0.01443300 | -0.87759500 |
| C | 0.59921900  | 0.49315200  | 0.00008900  |
| H | 0.98949400  | -0.53224700 | 0.00062200  |
| H | 1.00365000  | 1.00393600  | -0.88507000 |
| H | 1.00385000  | 1.00492900  | 0.88458400  |

## Cp<sub>2</sub>ZrHPr

M06/BS1

E(RM06) = -552.842819158  
Zero-point correction= 0.266694 (Hartree/Particle)  
Thermal correction to Energy= 0.281830  
Thermal correction to Enthalpy= 0.282774  
Thermal correction to Gibbs Free Energy= 0.223091  
Sum of electronic and zero-point Energies= -552.576125  
Sum of electronic and thermal Energies= -552.560990  
Sum of electronic and thermal Enthalpies= -552.560045  
Sum of electronic and thermal Free Energies= -552.619728  
E(RM06/BS2) = -553.017705864

|    |             |             |             |
|----|-------------|-------------|-------------|
| C  | -2.17618900 | -0.92078000 | -0.74258100 |
| C  | -2.45466600 | 0.45338300  | -0.94364900 |
| C  | -2.17536600 | 1.14467700  | 0.25813500  |
| C  | -1.68571700 | -1.07246800 | 0.57483500  |
| C  | -1.68871800 | 0.20742100  | 1.19551600  |
| H  | -2.28700900 | -1.70830300 | -1.47850900 |
| H  | -2.80856700 | 0.90363700  | -1.86703800 |
| H  | -2.28157400 | 2.21232800  | 0.41844500  |
| H  | -1.36817400 | -2.00366900 | 1.03459100  |
| H  | -1.39523800 | 0.42340500  | 2.21800700  |
| Zr | 0.05446900  | 0.28038200  | -0.60537900 |
| C  | 2.56093600  | 0.64928900  | -0.57676800 |
| C  | 2.07677000  | 1.13021900  | 0.66317300  |
| C  | 1.57059200  | 0.02798300  | 1.38829200  |
| C  | 2.37050600  | -0.75237500 | -0.61516700 |
| C  | 1.74211200  | -1.13573700 | 0.59425000  |
| H  | 2.98467600  | 1.25886800  | -1.36957000 |
| H  | 2.06840400  | 2.16733300  | 0.98341100  |
| H  | 1.13191700  | 0.06431500  | 2.38061900  |
| H  | 2.63069600  | -1.41220600 | -1.43446100 |
| H  | 1.44621900  | -2.14474600 | 0.86528400  |
| C  | 0.09472300  | 2.36987800  | -1.54972000 |
| H  | -0.81980200 | 2.96830600  | -1.41603400 |
| H  | 0.94109400  | 3.00961400  | -1.25367900 |
| C  | 0.23420600  | 2.00081900  | -3.03270000 |
| H  | -0.60152200 | 1.35516800  | -3.35872700 |
| H  | 1.14332300  | 1.39695700  | -3.20766900 |
| C  | 0.28372500  | 3.22319300  | -3.94583800 |
| H  | 0.38173700  | 2.94675800  | -5.00482400 |
| H  | -0.62907000 | 3.82442400  | -3.83425800 |
| H  | 1.13420100  | 3.86684800  | -3.68179600 |
| H  | 0.13247900  | -0.94654800 | -2.02013400 |

## Cp<sub>2</sub>ZrPr<sub>2</sub>

M06/BS1

E(RM06) = -670.687359819  
Zero-point correction= 0.353043 (Hartree/Particle)  
Thermal correction to Energy= 0.372770  
Thermal correction to Enthalpy= 0.373714  
Thermal correction to Gibbs Free Energy= 0.305215  
Sum of electronic and zero-point Energies= -670.334317  
Sum of electronic and thermal Energies= -670.314590  
Sum of electronic and thermal Enthalpies= -670.313646  
Sum of electronic and thermal Free Energies= -670.382145  
E(RM06/BS2) = -670.898842154

|   |             |             |             |
|---|-------------|-------------|-------------|
| C | -2.23454300 | 0.10852000  | -1.17107700 |
| C | -2.04596400 | 1.27718000  | -0.39507500 |
| C | -1.72389500 | 0.87822800  | 0.92077000  |
| C | -2.04434100 | -1.01308200 | -0.33402200 |
| C | -1.71347200 | -0.54176400 | 0.95778500  |

|    |             |             |             |
|----|-------------|-------------|-------------|
| H  | -2.46390200 | 0.08205800  | -2.23188300 |
| H  | -2.10574300 | 2.29908200  | -0.75714200 |
| H  | -1.51456400 | 1.53813500  | 1.75744300  |
| H  | -2.11078500 | -2.05366400 | -0.63400800 |
| H  | -1.50671000 | -1.15703400 | 1.82832400  |
| Zr | 0.23013000  | 0.13412100  | -0.48402600 |
| C  | 2.35917000  | 1.38761500  | 0.18682800  |
| C  | 1.51958000  | 1.33166000  | 1.32320100  |
| C  | 1.43204500  | -0.02472400 | 1.73463200  |
| C  | 2.76638300  | 0.07115000  | -0.11894000 |
| C  | 2.20192000  | -0.80205400 | 0.84119200  |
| H  | 2.61647100  | 2.27937300  | -0.37461700 |
| H  | 1.04220800  | 2.17839400  | 1.80760900  |
| H  | 0.86705200  | -0.39614600 | 2.58436000  |
| H  | 3.38034200  | -0.22455300 | -0.96467000 |
| H  | 2.31046400  | -1.88216800 | 0.86030400  |
| C  | 0.52895400  | 1.63728100  | -2.19655000 |
| H  | 0.71581600  | 2.64264700  | -1.77302000 |
| H  | 1.51230500  | 1.31586400  | -2.60272800 |
| C  | 0.61192800  | -1.84402900 | -1.60032300 |
| H  | 1.69967500  | -1.90161900 | -1.78905600 |
| H  | 0.39437400  | -2.68757400 | -0.91581500 |
| C  | -0.11035100 | -2.06738000 | -2.92695000 |
| H  | -1.20435300 | -2.03227100 | -2.78904900 |
| H  | 0.12374400  | -1.24220000 | -3.62194100 |
| C  | 0.25687000  | -3.38740400 | -3.59573100 |
| H  | -0.26052000 | -3.52620000 | -4.55540600 |
| H  | 1.33802100  | -3.44038800 | -3.78692500 |
| H  | -0.00092400 | -4.23734400 | -2.94753000 |
| C  | -0.45315900 | 1.77163900  | -3.35578500 |
| H  | -1.42114600 | 2.15361800  | -2.98971200 |
| H  | -0.67213300 | 0.78229400  | -3.79295400 |
| C  | 0.04908200  | 2.69140000  | -4.46271700 |
| H  | -0.67393800 | 2.78580400  | -5.28505100 |
| H  | 0.24744100  | 3.69957200  | -4.07127300 |
| H  | 0.99139100  | 2.31479400  | -4.88545900 |

### TS Cp<sub>2</sub>Zr---H---Pr reductive elimination

M06/BS1

E(RM06) = -552.794519403

|                                              |                             |
|----------------------------------------------|-----------------------------|
| Zero-point correction=                       | 0.264854 (Hartree/Particle) |
| Thermal correction to Energy=                | 0.279546                    |
| Thermal correction to Enthalpy=              | 0.280491                    |
| Thermal correction to Gibbs Free Energy=     | 0.222160                    |
| Sum of electronic and zero-point Energies=   | -552.529666                 |
| Sum of electronic and thermal Energies=      | -552.514973                 |
| Sum of electronic and thermal Enthalpies=    | -552.514029                 |
| Sum of electronic and thermal Free Energies= | -552.572359                 |

E(RM06/BS2) = -552.971509363

|    |             |             |             |
|----|-------------|-------------|-------------|
| C  | -2.01508500 | -0.38737600 | -1.20332500 |
| C  | -2.22629400 | 0.93528000  | -0.75350900 |
| C  | -2.02930900 | 0.97322800  | 0.65937800  |
| C  | -1.66358900 | -1.18079800 | -0.09204000 |
| C  | -1.68164700 | -0.34663800 | 1.05938700  |
| H  | -2.05537200 | -0.72900100 | -2.23317000 |
| H  | -2.49505700 | 1.78653400  | -1.37452000 |
| H  | -2.18767000 | 1.82529200  | 1.31073000  |
| H  | -1.41840500 | -2.23794500 | -0.11554000 |
| H  | -1.47111000 | -0.66831400 | 2.07570200  |
| Zr | 0.19697400  | 0.51558600  | -0.28380600 |
| C  | 2.63743100  | 0.76287500  | -0.06588800 |
| C  | 2.10385700  | 1.33521900  | 1.12450200  |
| C  | 1.50585100  | 0.29450200  | 1.86547900  |
| C  | 2.38693100  | -0.64207100 | -0.04276600 |
| C  | 1.67573700  | -0.91872900 | 1.14827100  |

|   |             |             |             |
|---|-------------|-------------|-------------|
| H | 3.18905300  | 1.29661000  | -0.83377100 |
| H | 2.14862300  | 2.37944400  | 1.41570200  |
| H | 0.98318100  | 0.40693800  | 2.81123100  |
| H | 2.70461200  | -1.36784100 | -0.78188900 |
| H | 1.30504700  | -1.89289000 | 1.45668200  |
| C | 0.57153600  | 1.53291800  | -2.30219500 |
| H | 0.29543500  | 2.36030900  | -1.53020100 |
| H | 1.62873300  | 1.72120500  | -2.53461800 |
| C | -0.27074200 | 1.74231500  | -3.55076000 |
| H | -1.32469400 | 1.50473000  | -3.34460700 |
| H | 0.06034400  | 1.01572700  | -4.30821900 |
| C | -0.15776500 | 3.15514000  | -4.10127700 |
| H | -0.73679800 | 3.27379800  | -5.02577300 |
| H | -0.52937600 | 3.89201200  | -3.37562700 |
| H | 0.88752300  | 3.41054100  | -4.32409700 |
| H | 0.58871900  | 0.14777300  | -2.15991100 |

### Cp<sub>2</sub>Zr-----HPr post-reductive elimination complex

M06/BS1:

|                                              |                |                             |
|----------------------------------------------|----------------|-----------------------------|
| E(RM06) =                                    | -552.803067858 |                             |
| Zero-point correction=                       |                | 0.270076 (Hartree/Particle) |
| Thermal correction to Energy=                |                | 0.285233                    |
| Thermal correction to Enthalpy=              |                | 0.286178                    |
| Thermal correction to Gibbs Free Energy=     |                | 0.227025                    |
| Sum of electronic and zero-point Energies=   |                | -552.532992                 |
| Sum of electronic and thermal Energies=      |                | -552.517835                 |
| Sum of electronic and thermal Enthalpies=    |                | -552.516890                 |
| Sum of electronic and thermal Free Energies= |                | -552.576043                 |

E(RM06/BS2) = -552.981055031

|    |             |             |             |
|----|-------------|-------------|-------------|
| C  | -1.98255900 | -0.49553200 | -1.22057800 |
| C  | -2.14832700 | 0.85894300  | -0.85845300 |
| C  | -1.93628100 | 0.99733200  | 0.54597300  |
| C  | -1.64714800 | -1.23464900 | -0.06713200 |
| C  | -1.62171800 | -0.31515300 | 1.02919700  |
| H  | -2.04211200 | -0.89809700 | -2.22904400 |
| H  | -2.38815000 | 1.67260700  | -1.54034400 |
| H  | -2.11465900 | 1.88459300  | 1.14131700  |
| H  | -1.47307400 | -2.30396500 | -0.01948600 |
| H  | -1.44403400 | -0.57969500 | 2.06794800  |
| Zr | 0.24975900  | 0.36296900  | -0.30330500 |
| C  | 2.63509700  | 0.53382900  | -0.08591200 |
| C  | 2.13514500  | 1.34433800  | 0.98399300  |
| C  | 1.48507800  | 0.48332800  | 1.88975000  |
| C  | 2.31806700  | -0.84100500 | 0.19277200  |
| C  | 1.59436400  | -0.84723200 | 1.41017400  |
| H  | 3.23548400  | 0.88681500  | -0.92065800 |
| H  | 2.24475800  | 2.41758300  | 1.09334400  |
| H  | 0.94881100  | 0.79160300  | 2.78310500  |
| H  | 2.63424300  | -1.71144900 | -0.36942100 |
| H  | 1.16494900  | -1.72499000 | 1.88660200  |
| C  | 0.70404800  | 1.45076000  | -2.56717400 |
| H  | 0.41429900  | 2.07417100  | -1.66142300 |
| H  | 1.74005700  | 1.74568300  | -2.77998700 |
| C  | -0.22531400 | 1.82975900  | -3.71297600 |
| H  | -1.21275500 | 1.37226400  | -3.55488700 |
| H  | 0.16752300  | 1.39783300  | -4.64423700 |
| C  | -0.36470500 | 3.33685800  | -3.84625500 |
| H  | -1.00030900 | 3.60974100  | -4.69668400 |
| H  | -0.81102200 | 3.76952600  | -2.93917100 |
| H  | 0.61392300  | 3.81496100  | -3.99149200 |
| H  | 0.72873700  | 0.32064600  | -2.47250000 |



## Cp<sub>2</sub>Zr

M06/BS1:

E(RM06) = -433.759209902  
Zero-point correction= 0.163708 (Hartree/Particle)  
Thermal correction to Energy= 0.174032  
Thermal correction to Enthalpy= 0.174976  
Thermal correction to Gibbs Free Energy= 0.126284  
Sum of electronic and zero-point Energies= -433.595502  
Sum of electronic and thermal Energies= -433.585178  
Sum of electronic and thermal Enthalpies= -433.584234  
Sum of electronic and thermal Free Energies= -433.632926  
E(RM06/BS2) = -433.896154413

|    |             |             |             |
|----|-------------|-------------|-------------|
| C  | -1.92606600 | -1.96142300 | -0.82393100 |
| C  | -2.03103500 | -0.55834700 | -0.74427700 |
| C  | -1.79233500 | -0.14988500 | 0.58957900  |
| C  | -1.61815900 | -2.47382200 | 0.47871400  |
| C  | -1.52864700 | -1.33322700 | 1.36372900  |
| H  | -2.06120900 | -2.55180900 | -1.72631400 |
| H  | -2.21640600 | 0.10606300  | -1.58507600 |
| H  | -1.85159200 | 0.86696800  | 0.96364600  |
| H  | -1.61345000 | -3.51867100 | 0.76989600  |
| H  | -1.42138500 | -1.37355700 | 2.44275400  |
| Zr | 0.33796300  | -1.23244000 | -0.02528600 |
| C  | 2.79469600  | -0.49706500 | 0.07769300  |
| C  | 2.13180400  | -0.12555200 | 1.27009700  |
| C  | 1.65491800  | -1.32963200 | 1.89440000  |
| C  | 2.74867100  | -1.89945300 | -0.06043100 |
| C  | 2.04669000  | -2.44817000 | 1.06454300  |
| H  | 3.22649900  | 0.19172400  | -0.64486100 |
| H  | 2.04136600  | 0.88311400  | 1.65996100  |
| H  | 1.20539100  | -1.39760800 | 2.87973300  |
| H  | 3.18479500  | -2.46503100 | -0.87950100 |
| H  | 1.97837400  | -3.49901600 | 1.32442900  |

## TS Cp<sub>2</sub>ZrPr<sub>2</sub> β-H to α' transfer

M06/BS1:

E(RM06) = -670.646885358  
Zero-point correction= 0.350347 (Hartree/Particle)  
Thermal correction to Energy= 0.368894  
Thermal correction to Enthalpy= 0.369838  
Thermal correction to Gibbs Free Energy= 0.305088  
Sum of electronic and zero-point Energies= -670.296538  
Sum of electronic and thermal Energies= -670.277992  
Sum of electronic and thermal Enthalpies= -670.277048  
Sum of electronic and thermal Free Energies= -670.341797  
E(RM06/BS2) = -670.861488677

|    |             |             |             |
|----|-------------|-------------|-------------|
| C  | -2.14520200 | -0.41108200 | -1.21166200 |
| C  | -1.96004500 | 0.89187200  | -0.67171900 |
| C  | -1.67176200 | 0.75410800  | 0.70008200  |
| C  | -1.99589800 | -1.34511500 | -0.16033900 |
| C  | -1.67559100 | -0.63225700 | 1.01464800  |
| H  | -2.38916600 | -0.64343000 | -2.24373000 |
| H  | -2.01893900 | 1.82671000  | -1.22207900 |
| H  | -1.45997300 | 1.56378700  | 1.39267800  |
| H  | -2.08516500 | -2.42182700 | -0.24502200 |
| H  | -1.48239000 | -1.06874900 | 1.99036200  |
| Zr | 0.28866800  | -0.25784200 | -0.53762500 |
| C  | 2.50303000  | 1.01518800  | -0.24718500 |
| C  | 1.62622300  | 1.43006600  | 0.78137200  |
| C  | 1.41389600  | 0.31845000  | 1.64062400  |
| C  | 2.79611000  | -0.35004800 | -0.05400700 |
| C  | 2.12715200  | -0.78382200 | 1.12161500  |

|   |             |             |             |
|---|-------------|-------------|-------------|
| H | 2.85246700  | 1.63293900  | -1.06784400 |
| H | 1.20654800  | 2.42506600  | 0.90214900  |
| H | 0.79379700  | 0.31327300  | 2.53240400  |
| H | 3.41506900  | -0.96819600 | -0.69751700 |
| H | 2.15444500  | -1.78465800 | 1.53884300  |
| C | 0.50697900  | 1.28714900  | -2.56330600 |
| H | 0.37633100  | 2.13682900  | -1.87283500 |
| H | 1.53154800  | 1.38877300  | -2.95740600 |
| C | 0.71843700  | -2.43926700 | -1.09779600 |
| H | 1.64065100  | -2.85590000 | -0.68330500 |
| H | -0.09482400 | -3.17048900 | -1.05461900 |
| C | 0.83396700  | -1.71148100 | -2.37322000 |
| H | 0.59302100  | -0.15210600 | -2.43559700 |
| H | 1.86889300  | -1.58939300 | -2.72604700 |
| C | -0.07881200 | -2.15547400 | -3.50165100 |
| H | -0.13429700 | -1.43172200 | -4.32728600 |
| H | 0.26682100  | -3.11219100 | -3.92216900 |
| H | -1.10326900 | -2.32090000 | -3.13907000 |
| C | -0.48111600 | 1.42445200  | -3.71745900 |
| H | -1.49493900 | 1.13113700  | -3.40190700 |
| H | -0.21114800 | 0.72160000  | -4.52141400 |
| C | -0.52736300 | 2.83824100  | -4.27867100 |
| H | -1.21067000 | 2.92042400  | -5.13443500 |
| H | -0.86459000 | 3.55117000  | -3.51158900 |
| H | 0.46852800  | 3.16354100  | -4.61075700 |

### Cp<sub>2</sub>Zr(C<sub>3</sub>H<sub>6</sub>)---HPr post elimination complex

M06/BS1:

|                                              |                |                             |
|----------------------------------------------|----------------|-----------------------------|
| E(RM06) =                                    | -670.673814149 |                             |
| Zero-point correction=                       |                | 0.352943 (Hartree/Particle) |
| Thermal correction to Energy=                |                | 0.372845                    |
| Thermal correction to Enthalpy=              |                | 0.373789                    |
| Thermal correction to Gibbs Free Energy=     |                | 0.304617                    |
| Sum of electronic and zero-point Energies=   |                | -670.320871                 |
| Sum of electronic and thermal Energies=      |                | -670.300970                 |
| Sum of electronic and thermal Enthalpies=    |                | -670.300025                 |
| Sum of electronic and thermal Free Energies= |                | -670.369197                 |
| E(RM06/BS2) =                                | -670.886572990 |                             |

|    |             |             |             |
|----|-------------|-------------|-------------|
| C  | -2.02699800 | -0.48105400 | -1.28177900 |
| C  | -1.83343800 | 0.76643400  | -0.61834600 |
| C  | -1.72374600 | 0.50745900  | 0.76696500  |
| C  | -2.04149100 | -1.49566400 | -0.29422400 |
| C  | -1.83664600 | -0.89118100 | 0.96500700  |
| H  | -2.16311300 | -0.62761800 | -2.34931400 |
| H  | -1.79704200 | 1.74562800  | -1.08916000 |
| H  | -1.55579100 | 1.25061500  | 1.54121200  |
| H  | -2.16599000 | -2.55747000 | -0.47375000 |
| H  | -1.76964200 | -1.40916400 | 1.91772700  |
| Zr | 0.30520000  | -0.49086800 | -0.37113700 |
| C  | 2.54709400  | 0.74364700  | -0.36053900 |
| C  | 1.67201600  | 1.37380300  | 0.56373200  |
| C  | 1.44508700  | 0.45808200  | 1.62846800  |
| C  | 2.83780900  | -0.54736000 | 0.11838000  |
| C  | 2.15842300  | -0.73321600 | 1.34744800  |
| H  | 2.90904500  | 1.16912400  | -1.29251000 |
| H  | 1.27463700  | 2.38249000  | 0.48880300  |
| H  | 0.83098800  | 0.64114800  | 2.50539400  |
| H  | 3.44310800  | -1.29088400 | -0.39050000 |
| H  | 2.17620600  | -1.63198000 | 1.95544500  |
| C  | 0.51332500  | 1.55165800  | -3.03030500 |
| H  | 0.49972700  | 2.20457200  | -2.14461000 |
| H  | 1.47854800  | 1.71055800  | -3.53344300 |
| C  | 0.76999600  | -2.69530800 | -0.79448100 |
| H  | 1.67765800  | -3.07948400 | -0.31967200 |
| H  | -0.04689200 | -3.42096700 | -0.73228800 |

|   |             |             |             |
|---|-------------|-------------|-------------|
| C | 0.89344900  | -1.95129500 | -2.05016600 |
| H | 0.50864700  | 0.48774500  | -2.71661900 |
| H | 1.92697300  | -1.75564100 | -2.36944100 |
| C | 0.01273700  | -2.32787200 | -3.22206500 |
| H | -0.09454800 | -1.51343400 | -3.95792200 |
| H | 0.40917000  | -3.20012800 | -3.76853400 |
| H | -1.00133900 | -2.60151600 | -2.89529800 |
| C | -0.65119200 | 1.86133300  | -3.95615100 |
| H | -1.60262200 | 1.65356500  | -3.44129700 |
| H | -0.62333100 | 1.18350300  | -4.82229400 |
| C | -0.63185700 | 3.30671500  | -4.42664600 |
| H | -1.46918400 | 3.53032300  | -5.09868700 |
| H | -0.69381700 | 3.99854500  | -3.57435400 |
| H | 0.29875800  | 3.53398700  | -4.96503700 |

### Cp<sub>2</sub>Zr(C<sub>3</sub>H<sub>6</sub>) (metallacyclopropane complex)

M06/BS1:

|                                              |                |             |                    |
|----------------------------------------------|----------------|-------------|--------------------|
| E(RM06) =                                    | -551.635931704 |             |                    |
| Zero-point correction=                       |                | 0.247438    | (Hartree/Particle) |
| Thermal correction to Energy=                |                | 0.261525    |                    |
| Thermal correction to Enthalpy=              |                | 0.262469    |                    |
| Thermal correction to Gibbs Free Energy=     |                | 0.206599    |                    |
| Sum of electronic and zero-point Energies=   |                | -551.388494 |                    |
| Sum of electronic and thermal Energies=      |                | -551.374407 |                    |
| Sum of electronic and thermal Enthalpies=    |                | -551.373462 |                    |
| Sum of electronic and thermal Free Energies= |                | -551.429333 |                    |
| E(RM06/BS2) =                                | -551.809363182 |             |                    |

|    |             |             |             |
|----|-------------|-------------|-------------|
| C  | -1.90414200 | -0.33241000 | -1.33497800 |
| C  | -1.69360700 | 0.80056700  | -0.50313700 |
| C  | -1.78020200 | 0.37498000  | 0.84890400  |
| C  | -2.11216200 | -1.45214200 | -0.49050000 |
| C  | -2.03727700 | -1.01686000 | 0.85098800  |
| H  | -1.91345200 | -0.34338400 | -2.41986400 |
| H  | -1.51697800 | 1.81852800  | -0.83959000 |
| H  | -1.66314000 | 1.00549500  | 1.72535200  |
| H  | -2.28554300 | -2.47229300 | -0.81562500 |
| H  | -2.13298900 | -1.64804700 | 1.73023200  |
| Zr | 0.28836200  | -0.65546200 | -0.15523800 |
| C  | 2.40644100  | 0.70210000  | -0.53076300 |
| C  | 1.59772800  | 1.37756200  | 0.42084500  |
| C  | 1.55269800  | 0.58125500  | 1.59910100  |
| C  | 2.85187500  | -0.50263500 | 0.05740100  |
| C  | 2.33414500  | -0.58053800 | 1.36799300  |
| H  | 2.63231100  | 1.03877900  | -1.53813200 |
| H  | 1.11560200  | 2.34149500  | 0.28482800  |
| H  | 1.03239900  | 0.83132300  | 2.51904000  |
| H  | 3.45279300  | -1.26337600 | -0.43063700 |
| H  | 2.48979100  | -1.39858500 | 2.06519500  |
| C  | 0.77411400  | -2.79251100 | -0.71729100 |
| H  | 1.70240000  | -3.20359800 | -0.30629400 |
| H  | -0.03239100 | -3.53364600 | -0.69924600 |
| C  | 0.86491700  | -1.96170700 | -1.93921900 |
| H  | 1.89238000  | -1.74715200 | -2.25920600 |
| C  | -0.00723100 | -2.31142100 | -3.12396400 |
| H  | -0.07544200 | -1.48811300 | -3.85141100 |
| H  | 0.37961700  | -3.19033900 | -3.66663100 |
| H  | -1.03375000 | -2.56225800 | -2.81957700 |

### Cp<sub>2</sub>ZrPrCl

M06/BS1:

|                        |                |          |                    |
|------------------------|----------------|----------|--------------------|
| E(RM06) =              | -1012.50939473 |          |                    |
| Zero-point correction= |                | 0.261860 | (Hartree/Particle) |

Thermal correction to Energy= 0.278273  
 Thermal correction to Enthalpy= 0.279217  
 Thermal correction to Gibbs Free Energy= 0.217589  
 Sum of electronic and zero-point Energies= -1012.247534  
 Sum of electronic and thermal Energies= -1012.231122  
 Sum of electronic and thermal Enthalpies= -1012.230178  
 Sum of electronic and thermal Free Energies= -1012.291806  
 E(RM06/BS2) = -1012.71612526

|    |             |             |             |
|----|-------------|-------------|-------------|
| C  | -2.08082800 | 0.20602600  | -1.28780100 |
| C  | -1.88698200 | 1.41854700  | -0.58526000 |
| C  | -1.64357900 | 1.10586700  | 0.77025200  |
| C  | -1.98566400 | -0.85915300 | -0.36077200 |
| C  | -1.70429600 | -0.30726100 | 0.90944000  |
| H  | -2.23779900 | 0.11380100  | -2.35807100 |
| H  | -1.86560100 | 2.40938100  | -1.02784300 |
| H  | -1.45880900 | 1.81939600  | 1.56722900  |
| H  | -2.09139300 | -1.91524900 | -0.58389200 |
| H  | -1.58309100 | -0.86375600 | 1.83332300  |
| Zr | 0.32927700  | 0.18217600  | -0.49223300 |
| C  | 2.43973700  | 1.29570300  | 0.40963500  |
| C  | 1.54052700  | 1.15032300  | 1.49038400  |
| C  | 1.39307100  | -0.23971700 | 1.75065800  |
| C  | 2.82538500  | 0.00562100  | -0.01591700 |
| C  | 2.18972100  | -0.94399900 | 0.82066800  |
| H  | 2.72969600  | 2.23033000  | -0.05899800 |
| H  | 1.06545700  | 1.95816000  | 2.03802800  |
| H  | 0.78787800  | -0.68026300 | 2.53634300  |
| H  | 3.46452500  | -0.21709700 | -0.86491200 |
| H  | 2.28051600  | -2.02228700 | 0.74318600  |
| C  | 0.60273300  | -1.84592500 | -1.53193000 |
| H  | 1.68438800  | -1.87078100 | -1.76131400 |
| H  | 0.42990100  | -2.68998000 | -0.83836000 |
| C  | -0.15834900 | -2.08346200 | -2.83380800 |
| H  | -1.24201600 | -2.15438500 | -2.64586700 |
| H  | -0.02825900 | -1.21982500 | -3.50636700 |
| C  | 0.29420900  | -3.34810500 | -3.55509600 |
| H  | -0.25968900 | -3.51043100 | -4.49000100 |
| H  | 1.36296400  | -3.29431500 | -3.80538400 |
| H  | 0.15097300  | -4.23432200 | -2.92019000 |
| Cl | 0.85404200  | 1.55619000  | -2.45049200 |

### Complex 10, Cp<sub>2</sub>Zr(μ-Pr)(μ-Cl)ZrCp<sub>2</sub> (Closed shell singlet)

M06/BS1:

E(RM06) = -1446.35108460  
 Zero-point correction= 0.431880 (Hartree/Particle)  
 Thermal correction to Energy= 0.458117  
 Thermal correction to Enthalpy= 0.459061  
 Thermal correction to Gibbs Free Energy= 0.378509  
 Sum of electronic and zero-point Energies= -1445.919204  
 Sum of electronic and thermal Energies= -1445.892967  
 Sum of electronic and thermal Enthalpies= -1445.892023  
 Sum of electronic and thermal Free Energies= -1445.972576  
 E(RM06/BS2) = -1446.69298361

|   |             |             |             |
|---|-------------|-------------|-------------|
| C | -2.46533900 | -0.88831100 | -0.23153700 |
| C | -2.45063300 | 0.47229600  | 0.14021900  |
| C | -1.82120400 | 0.58192400  | 1.39905200  |
| C | -1.86398400 | -1.63864800 | 0.81435700  |
| C | -1.47788100 | -0.72925300 | 1.82370700  |
| H | -2.87581700 | -1.29903800 | -1.14696100 |
| H | -2.79792100 | 1.31004100  | -0.45644400 |
| H | -1.63871000 | 1.50472100  | 1.94205300  |
| H | -1.74911100 | -2.71626400 | 0.84566100  |
| H | -1.00100700 | -0.99223600 | 2.76253000  |

|    |             |             |             |
|----|-------------|-------------|-------------|
| Zr | 0.01362700  | -0.23946600 | -0.13396100 |
| C  | 2.48889000  | 0.36669200  | -0.06445300 |
| C  | 1.83564000  | 1.15782000  | 0.92155100  |
| C  | 1.38063300  | 0.28930500  | 1.93268300  |
| C  | 2.44286900  | -0.98178700 | 0.35514200  |
| C  | 1.73254100  | -1.03960000 | 1.57260000  |
| H  | 2.96681600  | 0.74984100  | -0.95846800 |
| H  | 1.70356300  | 2.23450900  | 0.88810800  |
| H  | 0.83467200  | 0.58517000  | 2.82292400  |
| H  | 2.86100100  | -1.83319000 | -0.17136600 |
| H  | 1.50947300  | -1.93832800 | 2.14121300  |
| C  | 0.24439100  | -2.04518200 | -1.62442800 |
| H  | 0.13433500  | -1.96677000 | -2.78901100 |
| H  | 1.31919100  | -2.28580100 | -1.59267500 |
| C  | -0.48812700 | -3.38429500 | -1.44905400 |
| H  | -0.23625300 | -3.79353800 | -0.45678200 |
| H  | -1.58152000 | -3.23946800 | -1.43893600 |
| C  | -0.13692400 | -4.41508400 | -2.51578400 |
| H  | -0.64835900 | -5.37404800 | -2.35531600 |
| H  | -0.41388700 | -4.05378600 | -3.51932700 |
| H  | 0.94586100  | -4.60977000 | -2.53026100 |
| C  | -2.47970700 | 0.15799500  | -3.38356600 |
| C  | -2.25368900 | -1.16637700 | -3.81392300 |
| C  | -1.59706900 | -1.12122200 | -5.06514700 |
| C  | -1.97627300 | 1.04294300  | -4.37861700 |
| C  | -1.44171200 | 0.24576000  | -5.42056000 |
| H  | -2.95533000 | 0.46002300  | -2.45963200 |
| H  | -2.49823600 | -2.07204900 | -3.26509100 |
| H  | -1.27741300 | -1.98006700 | -5.64893800 |
| H  | -2.01496200 | 2.12674900  | -4.34581400 |
| H  | -0.99139800 | 0.61871700  | -6.33517500 |
| Zr | 0.04075700  | -0.08737400 | -3.45885300 |
| C  | 2.53537100  | -0.39323900 | -3.34165900 |
| C  | 2.03858500  | -1.20162800 | -4.40852800 |
| C  | 1.55662600  | -0.32780900 | -5.41148400 |
| C  | 2.36562800  | 0.96375000  | -3.70346600 |
| C  | 1.74505900  | 1.01062400  | -4.96858500 |
| H  | 2.99366000  | -0.76672600 | -2.43392100 |
| H  | 2.06004200  | -2.28663500 | -4.45212600 |
| H  | 1.11970000  | -0.63103900 | -6.35768500 |
| H  | 2.60825200  | 1.82780200  | -3.09295800 |
| H  | 1.46039200  | 1.90994900  | -5.50740600 |
| Cl | -0.10575200 | 1.84163800  | -1.68314900 |

### Complex 10, Cp<sub>2</sub>Zr(μ-Pr)(μ-Cl)ZrCp<sub>2</sub> (open shell singlet)

M06/BS1:

E(UM06) = -1446.33521163

Zero-point correction= 0.429476 (Hartree/Particle)

Thermal correction to Energy= 0.456761

Thermal correction to Enthalpy= 0.457705

Thermal correction to Gibbs Free Energy= 0.372229

Sum of electronic and zero-point Energies= -1445.905736

Sum of electronic and thermal Energies= -1445.878451

Sum of electronic and thermal Enthalpies= -1445.877506

Sum of electronic and thermal Free Energies= -1445.962983

E(UM06/BS2) = -1446.67876557

|   |             |             |             |
|---|-------------|-------------|-------------|
| C | -2.54326100 | -0.92820900 | 0.18668800  |
| C | -2.54378800 | 0.47151200  | 0.37121000  |
| C | -1.99001000 | 0.75766300  | 1.64097000  |
| C | -1.98672100 | -1.53169100 | 1.34669700  |
| C | -1.65389300 | -0.48397100 | 2.24894900  |
| H | -2.89183400 | -1.45850200 | -0.69576300 |
| H | -2.86634800 | 1.21334100  | -0.35338500 |
| H | -1.85973300 | 1.74465200  | 2.07405700  |

|    |             |             |             |
|----|-------------|-------------|-------------|
| H  | -1.87267700 | -2.59696600 | 1.52339400  |
| H  | -1.23671500 | -0.61486600 | 3.24212700  |
| Zr | -0.09394900 | -0.27470600 | 0.34866500  |
| C  | 2.40043700  | 0.14307200  | 0.20249300  |
| C  | 1.89946000  | 0.86581600  | 1.32028400  |
| C  | 1.45384400  | -0.09049100 | 2.27077700  |
| C  | 2.27050700  | -1.23774400 | 0.46579600  |
| C  | 1.67161500  | -1.39161600 | 1.73751900  |
| H  | 2.78704700  | 0.58608100  | -0.71082800 |
| H  | 1.88583100  | 1.94502200  | 1.43244000  |
| H  | 1.03356200  | 0.13446000  | 3.24572200  |
| H  | 2.53665900  | -2.04798900 | -0.20861300 |
| H  | 1.43268700  | -2.33412200 | 2.22267500  |
| C  | -0.05752600 | -1.72380400 | -1.51625000 |
| H  | -0.92058300 | -1.37010800 | -2.11524900 |
| H  | 0.90656200  | -1.46112900 | -1.99703900 |
| C  | -0.15620300 | -3.23906800 | -1.40363800 |
| H  | 0.42752900  | -3.57339400 | -0.52712800 |
| H  | -1.20111100 | -3.50803100 | -1.17075100 |
| C  | 0.30916100  | -4.01389200 | -2.63071600 |
| H  | 0.19430700  | -5.10004200 | -2.50958600 |
| H  | -0.25091000 | -3.71047000 | -3.52996100 |
| H  | 1.37336300  | -3.81165500 | -2.83071100 |
| C  | -2.44851600 | 0.16780700  | -3.72365600 |
| C  | -2.29513100 | -1.16444800 | -4.17513700 |
| C  | -1.64516500 | -1.13498100 | -5.42817300 |
| C  | -1.91459000 | 1.03952800  | -4.71407600 |
| C  | -1.42600400 | 0.22785400  | -5.76866800 |
| H  | -2.87842300 | 0.47597000  | -2.77564300 |
| H  | -2.58398200 | -2.06096100 | -3.63168000 |
| H  | -1.36853400 | -1.99901000 | -6.02608300 |
| H  | -1.90093600 | 2.12374200  | -4.67082400 |
| H  | -0.96887000 | 0.58935900  | -6.68441600 |
| Zr | 0.03635200  | -0.17319400 | -3.81169200 |
| C  | 2.53772300  | -0.57219900 | -3.65649600 |
| C  | 2.03137000  | -1.30586300 | -4.76775800 |
| C  | 1.58143800  | -0.35874300 | -5.72239700 |
| C  | 2.39681700  | 0.80557100  | -3.92809500 |
| C  | 1.79026400  | 0.94763700  | -5.19617400 |
| H  | 2.96249200  | -1.00142100 | -2.75280100 |
| H  | 2.03039100  | -2.38536600 | -4.88111300 |
| H  | 1.16168700  | -0.59384200 | -6.69533700 |
| H  | 2.64651400  | 1.61773200  | -3.25265600 |
| H  | 1.54522700  | 1.88523700  | -5.68640100 |
| Cl | -0.04807300 | 1.47068100  | -1.74082200 |

### Complex 10, Cp<sub>2</sub>Zr(μ-Pr)(μ-Cl)ZrCp<sub>2</sub> (triplet)

M06/BS1:

|                                              |                |              |                    |
|----------------------------------------------|----------------|--------------|--------------------|
| E(UM06) =                                    | -1446.33478620 |              |                    |
| Zero-point correction=                       |                | 0.429503     | (Hartree/Particle) |
| Thermal correction to Energy=                |                | 0.456711     |                    |
| Thermal correction to Enthalpy=              |                | 0.457655     |                    |
| Thermal correction to Gibbs Free Energy=     |                | 0.371766     |                    |
| Sum of electronic and zero-point Energies=   |                | -1445.905283 |                    |
| Sum of electronic and thermal Energies=      |                | -1445.878076 |                    |
| Sum of electronic and thermal Enthalpies=    |                | -1445.877131 |                    |
| Sum of electronic and thermal Free Energies= |                | -1445.963020 |                    |
| E(UM06/BS2) =                                | -1446.67799009 |              |                    |

|   |             |             |             |
|---|-------------|-------------|-------------|
| C | -2.53429500 | -0.93191400 | 0.19555300  |
| C | -2.53095500 | 0.46716200  | 0.38305600  |
| C | -1.99224300 | 0.74838100  | 1.66075000  |
| C | -1.99447900 | -1.54064600 | 1.36074600  |
| C | -1.66881600 | -0.49621400 | 2.26979700  |
| H | -2.87290600 | -1.45793200 | -0.69318700 |

|    |             |             |             |
|----|-------------|-------------|-------------|
| H  | -2.84012700 | 1.21161300  | -0.34470800 |
| H  | -1.86444500 | 1.73368600  | 2.09837100  |
| H  | -1.88748700 | -2.60689900 | 1.53611800  |
| H  | -1.26314100 | -0.63091100 | 3.26733600  |
| Zr | -0.08466500 | -0.28799000 | 0.39124700  |
| C  | 2.41222600  | 0.10181800  | 0.26766900  |
| C  | 1.90804900  | 0.84042600  | 1.37421000  |
| C  | 1.44393700  | -0.10272400 | 2.32890900  |
| C  | 2.26675600  | -1.27524600 | 0.54281100  |
| C  | 1.65441500  | -1.41081600 | 1.80995800  |
| H  | 2.81329500  | 0.53171500  | -0.64584100 |
| H  | 1.90569700  | 1.92056000  | 1.47731400  |
| H  | 1.01494900  | 0.13548700  | 3.29698000  |
| H  | 2.53072300  | -2.09373200 | -0.12203300 |
| H  | 1.40000300  | -2.34592200 | 2.30153800  |
| C  | -0.03606600 | -1.69683600 | -1.50935700 |
| H  | -0.89544500 | -1.30731400 | -2.09054500 |
| H  | 0.93216700  | -1.42243300 | -1.97497100 |
| C  | -0.15441500 | -3.21194800 | -1.42548100 |
| H  | 0.41913600  | -3.56993300 | -0.55136100 |
| H  | -1.20408200 | -3.47101800 | -1.20222100 |
| C  | 0.30771900  | -3.97524800 | -2.66093500 |
| H  | 0.18283700  | -5.06190700 | -2.55403800 |
| H  | -0.24702300 | -3.65535000 | -3.55785000 |
| H  | 1.37432000  | -3.78023600 | -2.85453900 |
| C  | -2.44120300 | 0.18058900  | -3.73529900 |
| C  | -2.29421200 | -1.16008600 | -4.16239600 |
| C  | -1.65886100 | -1.15640700 | -5.42364900 |
| C  | -1.91532800 | 1.03191400  | -4.74710400 |
| C  | -1.43972000 | 0.19913100  | -5.79206900 |
| H  | -2.85922300 | 0.50837100  | -2.78857500 |
| H  | -2.57756500 | -2.04537000 | -3.59814300 |
| H  | -1.39200700 | -2.03232900 | -6.00843600 |
| H  | -1.90024900 | 2.11681700  | -4.72573600 |
| H  | -0.99253800 | 0.54236700  | -6.71970800 |
| Zr | 0.04312100  | -0.16831300 | -3.84829700 |
| C  | 2.54464600  | -0.52181100 | -3.70021100 |
| C  | 2.04827100  | -1.29628900 | -4.78832800 |
| C  | 1.57817300  | -0.38614300 | -5.76820700 |
| C  | 2.38104000  | 0.84535200  | -4.01300200 |
| C  | 1.76883600  | 0.93842000  | -5.28247800 |
| H  | 2.98244400  | -0.91675800 | -2.78731900 |
| H  | 2.06572900  | -2.37841200 | -4.87077700 |
| H  | 1.15486900  | -0.65763200 | -6.73020900 |
| H  | 2.61937900  | 1.68054700  | -3.36205500 |
| H  | 1.50471700  | 1.85611700  | -5.79990100 |
| Cl | -0.01659700 | 1.42254700  | -1.73264900 |

### Complex 11, Zr<sub>2</sub>Cp<sub>4</sub> (closed shell singlet)

M06/BS1:

E(RM06) = -867.611775273  
 Zero-point correction= 0.330767 (Hartree/Particle)  
 Thermal correction to Energy= 0.351300  
 Thermal correction to Enthalpy= 0.352244  
 Thermal correction to Gibbs Free Energy= 0.282850  
 Sum of electronic and zero-point Energies= -867.281008  
 Sum of electronic and thermal Energies= -867.260476  
 Sum of electronic and thermal Enthalpies= -867.259531  
 Sum of electronic and thermal Free Energies= -867.328926  
 E(RM06/BS2) = -867.884183797

|   |             |             |             |
|---|-------------|-------------|-------------|
| C | -0.36879800 | -0.07233800 | -1.30921700 |
| C | 0.94633600  | 0.53004800  | -1.33681300 |
| C | 1.34789600  | 0.67589000  | 0.04605800  |
| C | -0.72192000 | -0.33762800 | 0.03188400  |
| C | 0.32446000  | 0.13307600  | 0.86362000  |

|    |             |             |             |
|----|-------------|-------------|-------------|
| H  | -0.97297000 | -0.30168500 | -2.18242900 |
| H  | 1.24822500  | 1.19079000  | -2.19963200 |
| H  | 2.27247400  | 1.12072400  | 0.39796800  |
| H  | -1.63620400 | -0.81819200 | 0.36607600  |
| H  | 0.34636200  | 0.06885300  | 1.94802600  |
| Zr | 1.33150200  | -1.67278900 | -0.52755100 |
| C  | 3.39376100  | -2.90703800 | 0.27904500  |
| C  | 2.78467200  | -2.28129800 | 1.39961400  |
| C  | 1.53477800  | -2.91434200 | 1.63688500  |
| C  | 2.49717600  | -3.89184400 | -0.19408700 |
| C  | 1.34298200  | -3.90311800 | 0.64535700  |
| H  | 4.36781900  | -2.66533100 | -0.13235900 |
| H  | 3.21142800  | -1.47407600 | 1.98925300  |
| H  | 0.83189200  | -2.66049300 | 2.42543300  |
| H  | 2.65705500  | -4.55043600 | -1.04358900 |
| H  | 0.49468400  | -4.57497000 | 0.56386600  |
| C  | 1.20819100  | -1.49595900 | -4.06860400 |
| C  | 1.66780200  | -2.27884200 | -2.94132600 |
| C  | 3.05050200  | -2.60335900 | -3.22130800 |
| C  | 2.28384300  | -1.30360900 | -4.96304700 |
| C  | 3.41095300  | -1.99216000 | -4.44945600 |
| H  | 0.20204400  | -1.10600800 | -4.19440700 |
| H  | 0.93285600  | -2.89946100 | -2.35035300 |
| H  | 3.70337200  | -3.20193700 | -2.59487700 |
| H  | 2.25102800  | -0.72912300 | -5.88349800 |
| H  | 4.39224500  | -2.03202300 | -4.91397600 |
| Zr | 2.87495700  | -0.23916200 | -2.76708000 |
| C  | 4.62750000  | 0.58396700  | -1.13790500 |
| C  | 5.29337000  | -0.07105600 | -2.20831700 |
| C  | 5.11235100  | 0.70441700  | -3.38514200 |
| C  | 4.00435800  | 1.73591500  | -1.67029600 |
| C  | 4.30211400  | 1.81730300  | -3.06362200 |
| H  | 4.59676000  | 0.24929100  | -0.10642200 |
| H  | 5.86069800  | -0.99550100 | -2.13664100 |
| H  | 5.50175100  | 0.46597600  | -4.37106800 |
| H  | 3.40636200  | 2.45473500  | -1.11598700 |
| H  | 3.99950600  | 2.60971300  | -3.74035800 |

### Complex 11 (open shell singlet)

M06/BS1:

|                                              |                |             |                    |
|----------------------------------------------|----------------|-------------|--------------------|
| E(UM06) =                                    | -867.622241787 |             |                    |
| Zero-point correction=                       |                | 0.330870    | (Hartree/Particle) |
| Thermal correction to Energy=                |                | 0.351672    |                    |
| Thermal correction to Enthalpy=              |                | 0.352616    |                    |
| Thermal correction to Gibbs Free Energy=     |                | 0.281458    |                    |
| Sum of electronic and zero-point Energies=   |                | -867.291372 |                    |
| Sum of electronic and thermal Energies=      |                | -867.270570 |                    |
| Sum of electronic and thermal Enthalpies=    |                | -867.269625 |                    |
| Sum of electronic and thermal Free Energies= |                | -867.340784 |                    |

E(UM06/BS2) = -867.894080832

|    |             |             |             |
|----|-------------|-------------|-------------|
| C  | -0.37118600 | -0.07492900 | -1.36995100 |
| C  | 0.91438000  | 0.56994400  | -1.29742300 |
| C  | 1.20551500  | 0.73077200  | 0.10644800  |
| C  | -0.81051000 | -0.37233000 | -0.06463800 |
| C  | 0.15734500  | 0.13343900  | 0.84501100  |
| H  | -0.90643700 | -0.32202100 | -2.28161100 |
| H  | 1.31838200  | 1.19601400  | -2.13119700 |
| H  | 2.08246000  | 1.21742900  | 0.52280500  |
| H  | -1.72985600 | -0.88541900 | 0.19852400  |
| H  | 0.10491500  | 0.06147700  | 1.92782300  |
| Zr | 1.34800800  | -1.62437800 | -0.46257000 |
| C  | 3.42945800  | -2.85798400 | 0.24053800  |
| C  | 2.88347300  | -2.21260100 | 1.38261600  |
| C  | 1.63706400  | -2.82927800 | 1.68380200  |
| C  | 2.50603300  | -3.84999700 | -0.16799100 |



|    |            |             |             |
|----|------------|-------------|-------------|
| C  | 1.39703000 | -3.84374500 | 0.72161500  |
| H  | 4.37823500 | -2.62945200 | -0.23497300 |
| H  | 3.34891900 | -1.40712500 | 1.94451200  |
| H  | 0.97905200 | -2.56628900 | 2.50713900  |
| H  | 2.61966200 | -4.51351600 | -1.02187800 |
| H  | 0.54182900 | -4.51070800 | 0.68919300  |
| C  | 1.15563500 | -1.43032500 | -4.05970300 |
| C  | 1.65747000 | -2.28765900 | -3.01697800 |
| C  | 3.00339400 | -2.64047700 | -3.39983700 |
| C  | 2.18008200 | -1.19903900 | -4.99853500 |
| C  | 3.31599800 | -1.95294700 | -4.59637600 |
| H  | 0.15955100 | -1.00037300 | -4.10185300 |
| H  | 0.98092800 | -2.88471000 | -2.35585900 |
| H  | 3.66336900 | -3.30988600 | -2.85556600 |
| H  | 2.10998700 | -0.56864400 | -5.87900400 |
| H  | 4.26805800 | -1.98798100 | -5.11835600 |
| Zr | 2.95655100 | -0.29892200 | -2.76991400 |
| C  | 4.64446900 | 0.50869900  | -1.08436300 |
| C  | 5.33714100 | -0.19472800 | -2.10601400 |
| C  | 5.22406200 | 0.55452200  | -3.31016500 |
| C  | 4.09016300 | 1.67283900  | -1.67003200 |
| C  | 4.44737100 | 1.71195800  | -3.04498700 |
| H  | 4.55561900 | 0.20663900  | -0.04520200 |
| H  | 5.87918600 | -1.12882200 | -1.98458900 |
| H  | 5.65498300 | 0.28571900  | -4.27046500 |
| H  | 3.48891800 | 2.41973300  | -1.15710700 |
| H  | 4.19946900 | 2.49701800  | -3.75166300 |

### Complex 11 (triplet)

M06/BS1:

|                                              |                |             |                    |
|----------------------------------------------|----------------|-------------|--------------------|
| E(UM06) =                                    | -867.623302564 |             |                    |
| Zero-point correction=                       |                | 0.330720    | (Hartree/Particle) |
| Thermal correction to Energy=                |                | 0.351545    |                    |
| Thermal correction to Enthalpy=              |                | 0.352490    |                    |
| Thermal correction to Gibbs Free Energy=     |                | 0.280277    |                    |
| Sum of electronic and zero-point Energies=   |                | -867.292583 |                    |
| Sum of electronic and thermal Energies=      |                | -867.271757 |                    |
| Sum of electronic and thermal Enthalpies=    |                | -867.270813 |                    |
| Sum of electronic and thermal Free Energies= |                | -867.343026 |                    |
| E(UM06/BS2) =                                | -867.894661847 |             |                    |

|    |             |             |             |
|----|-------------|-------------|-------------|
| C  | -0.37992900 | -0.09116600 | -1.36458500 |
| C  | 0.90191900  | 0.56205700  | -1.29271400 |
| C  | 1.19068200  | 0.73075300  | 0.11290900  |
| C  | -0.82030700 | -0.38160000 | -0.05939400 |
| C  | 0.14243600  | 0.13069000  | 0.85135200  |
| H  | -0.91237300 | -0.34702600 | -2.27550100 |
| H  | 1.31126300  | 1.17618400  | -2.13096600 |
| H  | 2.05789800  | 1.23430300  | 0.52963500  |
| H  | -1.73497600 | -0.90358000 | 0.20377100  |
| H  | 0.08633000  | 0.06248400  | 1.93420800  |
| Zr | 1.36094400  | -1.61177100 | -0.44304400 |
| C  | 3.43149800  | -2.88081900 | 0.22677600  |
| C  | 2.90587200  | -2.22162700 | 1.37256200  |
| C  | 1.65528100  | -2.82496600 | 1.68939700  |
| C  | 2.49508300  | -3.86567000 | -0.16604500 |
| C  | 1.39611600  | -3.84187600 | 0.73280900  |
| H  | 4.37395300  | -2.65854200 | -0.26555300 |
| H  | 3.39063900  | -1.42504100 | 1.93039100  |
| H  | 1.01099600  | -2.55650900 | 2.52168300  |
| H  | 2.59019600  | -4.53113800 | -1.02064700 |
| H  | 0.53277900  | -4.49889500 | 0.70919600  |
| C  | 1.15809000  | -1.40993700 | -4.06847800 |
| C  | 1.65084900  | -2.28001500 | -3.03200100 |
| C  | 2.99545700  | -2.64385400 | -3.41579700 |
| C  | 2.18460500  | -1.18439400 | -5.00449100 |

|    |            |             |             |
|----|------------|-------------|-------------|
| C  | 3.31448400 | -1.94964100 | -4.60791600 |
| H  | 0.16689800 | -0.96871300 | -4.10870000 |
| H  | 0.97188900 | -2.86348000 | -2.36369300 |
| H  | 3.64457200 | -3.33174600 | -2.88183800 |
| H  | 2.12264500 | -0.54221900 | -5.87739400 |
| H  | 4.26578800 | -1.98885600 | -5.13094800 |
| Zr | 2.97657400 | -0.32157600 | -2.75996300 |
| C  | 4.63864800 | 0.54024300  | -1.07566300 |
| C  | 5.34036100 | -0.18688200 | -2.07691200 |
| C  | 5.23624900 | 0.53924600  | -3.29719600 |
| C  | 4.09151900 | 1.69311200  | -1.68796700 |
| C  | 4.45685000 | 1.70204300  | -3.05919300 |
| H  | 4.54024200 | 0.25879700  | -0.03114700 |
| H  | 5.89212800 | -1.11098900 | -1.92766100 |
| H  | 5.67811600 | 0.25479200  | -4.24786700 |
| H  | 3.48405400 | 2.44886500  | -1.19609900 |
| H  | 4.20985500 | 2.47087900  | -3.78409200 |

### Complex **11** singlet to triplet MECP

E (M06/BS1) = -867.6106967

|    |             |             |             |
|----|-------------|-------------|-------------|
| C  | -0.36588600 | -0.04790600 | -1.30741800 |
| C  | 0.95531100  | 0.54010500  | -1.35929700 |
| C  | 1.38615100  | 0.67543600  | 0.01346300  |
| C  | -0.69615000 | -0.31294500 | 0.04159300  |
| C  | 0.37323300  | 0.14344500  | 0.85045700  |
| H  | -0.98613600 | -0.26964900 | -2.17164400 |
| H  | 1.24080200  | 1.20115900  | -2.23032100 |
| H  | 2.32627200  | 1.09688700  | 0.34978600  |
| H  | -1.61186300 | -0.77694300 | 0.39449400  |
| H  | 0.41673000  | 0.07977900  | 1.93403700  |
| Zr | 1.30802500  | -1.68176900 | -0.57625200 |
| C  | 3.37017500  | -2.90109100 | 0.24590000  |
| C  | 2.75291000  | -2.28645800 | 1.36885000  |
| C  | 1.51194900  | -2.93408900 | 1.60765400  |
| C  | 2.48066700  | -3.89318100 | -0.22978900 |
| C  | 1.32815900  | -3.91672600 | 0.61337400  |
| H  | 4.34665500  | -2.65637900 | -0.15509500 |
| H  | 3.16950300  | -1.47403700 | 1.95898400  |
| H  | 0.80458500  | -2.68537700 | 2.39372300  |
| H  | 2.64619200  | -4.55551000 | -1.07496600 |
| H  | 0.48398500  | -4.59335800 | 0.52786300  |
| C  | 1.23522300  | -1.45156700 | -4.11296400 |
| C  | 1.60959600  | -2.23993800 | -2.95191400 |
| C  | 2.99798200  | -2.60794600 | -3.15766300 |
| C  | 2.36164300  | -1.31526400 | -4.95653200 |
| C  | 3.43540700  | -2.03172200 | -4.37838400 |
| H  | 0.25041900  | -1.02982900 | -4.29301900 |
| H  | 0.81846200  | -2.84964100 | -2.41700000 |
| H  | 3.60215300  | -3.21533300 | -2.49433500 |
| H  | 2.39431500  | -0.75409900 | -5.88559100 |
| H  | 4.43560800  | -2.11325900 | -4.79460400 |
| Zr | 2.86052700  | -0.23234700 | -2.75246500 |
| C  | 4.63883900  | 0.56686300  | -1.13030300 |
| C  | 5.29138400  | -0.08342100 | -2.21198300 |
| C  | 5.11059300  | 0.70419800  | -3.38017300 |
| C  | 4.01864200  | 1.72608800  | -1.64871000 |
| C  | 4.30780900  | 1.81504500  | -3.04462100 |
| H  | 4.62472000  | 0.22861100  | -0.10010200 |
| H  | 5.85146500  | -1.01316800 | -2.15256400 |
| H  | 5.48636100  | 0.46718300  | -4.37194500 |
| H  | 3.43232000  | 2.44755200  | -1.08512200 |
| H  | 4.00143400  | 2.61252200  | -3.71417900 |

## TS11-12 (singlet)

M06/BS1:

E(RM06) = -867.595248696  
Zero-point correction= 0.327615 (Hartree/Particle)  
Thermal correction to Energy= 0.347566  
Thermal correction to Enthalpy= 0.348511  
Thermal correction to Gibbs Free Energy= 0.280500  
Sum of electronic and zero-point Energies= -867.267634  
Sum of electronic and thermal Energies= -867.247682  
Sum of electronic and thermal Enthalpies= -867.246738  
Sum of electronic and thermal Free Energies= -867.314749  
E(RM06/BS2) = -867.866424779

|    |             |             |             |
|----|-------------|-------------|-------------|
| C  | -0.23457900 | -0.13772100 | -1.36446000 |
| C  | 1.12698800  | 0.36560200  | -1.35823600 |
| C  | 1.40392800  | 0.57126600  | 0.04604500  |
| C  | -0.73225600 | -0.26016900 | -0.03230200 |
| C  | 0.28181500  | 0.18867800  | 0.83556500  |
| H  | -0.79427500 | -0.38602000 | -2.26474200 |
| H  | 1.43008300  | 1.09081500  | -2.66514900 |
| H  | 2.35655700  | 0.89913100  | 0.45448600  |
| H  | -1.71997000 | -0.60391100 | 0.26023100  |
| H  | 0.21806500  | 0.22565300  | 1.92059400  |
| Zr | 1.20836200  | -1.76783200 | -0.45262700 |
| C  | 3.35612000  | -2.81902700 | 0.23847100  |
| C  | 2.78257000  | -2.20888800 | 1.39099300  |
| C  | 1.60216100  | -2.92014500 | 1.74319300  |
| C  | 2.49376400  | -3.88822000 | -0.13295400 |
| C  | 1.41914600  | -3.95077700 | 0.80034500  |
| H  | 4.29608300  | -2.55190100 | -0.23092300 |
| H  | 3.19171200  | -1.35954100 | 1.93145200  |
| H  | 0.94241300  | -2.69049900 | 2.57451000  |
| H  | 2.64297800  | -4.57381500 | -0.96332200 |
| H  | 0.59887200  | -4.66312500 | 0.78765100  |
| C  | 1.16478800  | -1.47418200 | -4.14240400 |
| C  | 1.57635200  | -2.36052900 | -3.09865100 |
| C  | 2.96116800  | -2.66735800 | -3.31123000 |
| C  | 2.28063000  | -1.20172400 | -4.95397300 |
| C  | 3.38475600  | -1.94287000 | -4.44422700 |
| H  | 0.17090700  | -1.05917000 | -4.27364700 |
| H  | 0.86997800  | -2.97133300 | -2.50992400 |
| H  | 3.56605700  | -3.34530400 | -2.71844800 |
| H  | 2.29217400  | -0.54126200 | -5.81507500 |
| H  | 4.39269200  | -1.93605900 | -4.84900200 |
| Zr | 2.85805100  | -0.24796000 | -2.67794800 |
| C  | 4.68098300  | 0.57482500  | -1.11029800 |
| C  | 5.31969500  | -0.05276300 | -2.20872000 |
| C  | 5.06315800  | 0.72723400  | -3.36676200 |
| C  | 4.00697900  | 1.71850600  | -1.59601100 |
| C  | 4.24046700  | 1.81910800  | -2.99709200 |
| H  | 4.70105200  | 0.22968600  | -0.08090200 |
| H  | 5.91147400  | -0.96383000 | -2.16964700 |
| H  | 5.41367500  | 0.50823800  | -4.37199700 |
| H  | 3.40077300  | 2.40352500  | -1.01128900 |
| H  | 3.87982500  | 2.60558900  | -3.65035500 |

## TS11-12 triplet

M06/BS1:

E(UM06) = -867.603198683  
Zero-point correction= 0.327965 (Hartree/Particle)  
Thermal correction to Energy= 0.347880  
Thermal correction to Enthalpy= 0.348824  
Thermal correction to Gibbs Free Energy= 0.279451  
Sum of electronic and zero-point Energies= -867.275234

Sum of electronic and thermal Energies= -867.255319  
 Sum of electronic and thermal Enthalpies= -867.254374  
 Sum of electronic and thermal Free Energies= -867.323748  
 E(UM06/BS2) = -867.873758521

|    |             |             |             |
|----|-------------|-------------|-------------|
| C  | -0.42266400 | -0.06743300 | -1.34498300 |
| C  | 0.84470000  | 0.59154800  | -1.29835600 |
| C  | 1.22039700  | 0.69649600  | 0.07861900  |
| C  | -0.80001300 | -0.39634700 | -0.02669900 |
| C  | 0.21134300  | 0.08188800  | 0.84948100  |
| H  | -0.99612500 | -0.29073700 | -2.23801300 |
| H  | 1.26556900  | 1.16325200  | -2.14929200 |
| H  | 2.12158000  | 1.16731800  | 0.46154000  |
| H  | -1.70508700 | -0.92081300 | 0.26348600  |
| H  | 0.21991400  | -0.02765200 | 1.93029500  |
| Zr | 1.29428900  | -1.72776800 | -0.53053800 |
| C  | 3.36077500  | -2.94402300 | 0.26771100  |
| C  | 2.75191300  | -2.32892400 | 1.39138100  |
| C  | 1.50288800  | -2.97115600 | 1.61723600  |
| C  | 2.47836200  | -3.93849400 | -0.21341600 |
| C  | 1.32955100  | -3.96417800 | 0.62193200  |
| H  | 4.31997600  | -2.67093400 | -0.16426000 |
| H  | 3.17392000  | -1.52110100 | 1.98364800  |
| H  | 0.79880100  | -2.73591600 | 2.41064200  |
| H  | 2.63242700  | -4.56576100 | -1.08594300 |
| H  | 0.48074400  | -4.63122100 | 0.51697300  |
| C  | 1.23673500  | -1.37349900 | -3.91471900 |
| C  | 1.74645600  | -2.12527300 | -2.79674300 |
| C  | 3.05093400  | -2.57676100 | -3.24048000 |
| C  | 2.20762200  | -1.28166800 | -4.93943200 |
| C  | 3.33363600  | -2.03181700 | -4.52619000 |
| H  | 0.27166700  | -0.87225600 | -3.94196300 |
| H  | 0.54913500  | -2.76236900 | -1.97193300 |
| H  | 3.73773500  | -3.18938700 | -2.66140800 |
| H  | 2.10041800  | -0.75093700 | -5.88080900 |
| H  | 4.24315600  | -2.18101500 | -5.10333800 |
| Zr | 3.07326400  | -0.25503000 | -2.79108000 |
| C  | 4.76814000  | 0.68891600  | -1.16975500 |
| C  | 5.46111900  | -0.04336500 | -2.16893300 |
| C  | 5.29389500  | 0.64165000  | -3.40593600 |
| C  | 4.16295600  | 1.80635300  | -1.79213400 |
| C  | 4.48757900  | 1.78933300  | -3.17570100 |
| H  | 4.69357500  | 0.42001600  | -0.11883000 |
| H  | 6.03744900  | -0.95070200 | -2.01121300 |
| H  | 5.71424200  | 0.34065800  | -4.36110000 |
| H  | 3.54948600  | 2.55599300  | -1.29763600 |
| H  | 4.20370900  | 2.53503500  | -3.91088500 |

## Complex 12 triplet

M06/BS1:

E(UM06) = -867.631608269  
 Zero-point correction= 0.329123 (Hartree/Particle)  
 Thermal correction to Energy= 0.349458  
 Thermal correction to Enthalpy= 0.350402  
 Thermal correction to Gibbs Free Energy= 0.280432  
 Sum of electronic and zero-point Energies= -867.302485  
 Sum of electronic and thermal Energies= -867.282150  
 Sum of electronic and thermal Enthalpies= -867.281206  
 Sum of electronic and thermal Free Energies= -867.351177  
 E(UM06/BS2) = -867.901483469

|   |             |             |             |
|---|-------------|-------------|-------------|
| C | -0.41049900 | -0.02972900 | -1.41430500 |
| C | 0.88643800  | 0.54859100  | -1.31210200 |
| C | 1.23201100  | 0.57930600  | 0.07438300  |
| C | -0.84506300 | -0.37491900 | -0.11726900 |
| C | 0.16645400  | 0.00798200  | 0.79783300  |

|    |             |             |             |
|----|-------------|-------------|-------------|
| H  | -0.96266000 | -0.20504300 | -2.33131400 |
| H  | 1.33078200  | 1.16188100  | -2.12658900 |
| H  | 2.15312800  | 0.97279200  | 0.49546900  |
| H  | -1.78199700 | -0.86307700 | 0.12624400  |
| H  | 0.14335400  | -0.14158200 | 1.87361200  |
| Zr | 1.16836600  | -1.87138500 | -0.62818300 |
| C  | 3.35808000  | -2.83561900 | 0.15336200  |
| C  | 2.74049200  | -2.23752900 | 1.27847700  |
| C  | 1.57002500  | -2.98273200 | 1.58179000  |
| C  | 2.55881200  | -3.93647500 | -0.24814300 |
| C  | 1.46301100  | -4.03605300 | 0.64436200  |
| H  | 4.26728800  | -2.49177000 | -0.33356600 |
| H  | 3.10139700  | -1.36619700 | 1.81891100  |
| H  | 0.87229200  | -2.77667600 | 2.38863400  |
| H  | 2.74006100  | -4.58351700 | -1.09986200 |
| H  | 0.66817700  | -4.77056400 | 0.59503600  |
| C  | 1.28578500  | -1.43456900 | -3.92774200 |
| C  | 1.78979500  | -2.21671000 | -2.82716800 |
| C  | 3.13268300  | -2.54933600 | -3.24401700 |
| C  | 2.26998300  | -1.25356700 | -4.93032400 |
| C  | 3.42834700  | -1.95389800 | -4.50123700 |
| H  | 0.29303500  | -0.99103600 | -3.97555600 |
| H  | -0.32395300 | -2.94402000 | -0.98677900 |
| H  | 3.83794800  | -3.14680400 | -2.66840100 |
| H  | 2.15733100  | -0.70900100 | -5.86359400 |
| H  | 4.36486500  | -2.02982200 | -5.04918900 |
| Zr | 3.05814000  | -0.20529300 | -2.79121700 |
| C  | 4.78132500  | 0.67489400  | -1.17984100 |
| C  | 5.46414300  | -0.01414200 | -2.21257700 |
| C  | 5.26839800  | 0.70642700  | -3.42450300 |
| C  | 4.15134800  | 1.80615000  | -1.75718000 |
| C  | 4.45821100  | 1.83918400  | -3.14621600 |
| H  | 4.73474000  | 0.37666100  | -0.13547100 |
| H  | 6.04293800  | -0.92659500 | -2.09912800 |
| H  | 5.67509600  | 0.43873200  | -4.39529000 |
| H  | 3.54525700  | 2.53724200  | -1.22716500 |
| H  | 4.15730800  | 2.60524100  | -3.85297000 |

## Complex 12 singlet

M06/BS1:

|                                              |                |                             |
|----------------------------------------------|----------------|-----------------------------|
| E(RM06) =                                    | -867.628953413 |                             |
| Zero-point correction=                       |                | 0.329045 (Hartree/Particle) |
| Thermal correction to Energy=                |                | 0.349329                    |
| Thermal correction to Enthalpy=              |                | 0.350274                    |
| Thermal correction to Gibbs Free Energy=     |                | 0.281480                    |
| Sum of electronic and zero-point Energies=   |                | -867.299909                 |
| Sum of electronic and thermal Energies=      |                | -867.279624                 |
| Sum of electronic and thermal Enthalpies=    |                | -867.278680                 |
| Sum of electronic and thermal Free Energies= |                | -867.347473                 |

E(RM06/BS2) = -867.898455141

|    |             |             |             |
|----|-------------|-------------|-------------|
| C  | -0.23287400 | -0.10189900 | -1.36832000 |
| C  | 1.13581200  | 0.40171400  | -1.29421900 |
| C  | 1.33140900  | 0.53965900  | 0.13512900  |
| C  | -0.81061000 | -0.21649100 | -0.06967800 |
| C  | 0.16087100  | 0.17967100  | 0.86471700  |
| H  | -0.77819800 | -0.27525300 | -2.29285500 |
| H  | 2.04154100  | 1.20387000  | -3.82584600 |
| H  | 2.25065600  | 0.88409900  | 0.60657200  |
| H  | -1.81533800 | -0.56086400 | 0.16738300  |
| H  | 0.04281300  | 0.18466700  | 1.94587200  |
| Zr | 1.13810600  | -1.77149400 | -0.38753900 |
| C  | 3.35907900  | -2.67661400 | 0.22089600  |
| C  | 2.75373000  | -2.08176300 | 1.37193600  |
| C  | 1.64125700  | -2.88892200 | 1.76226200  |
| C  | 2.59769700  | -3.83286800 | -0.09874100 |

|    |            |             |             |
|----|------------|-------------|-------------|
| C  | 1.55530700 | -3.96448200 | 0.84755900  |
| H  | 4.26697800 | -2.35246300 | -0.27597800 |
| H  | 3.11547100 | -1.20949900 | 1.90784800  |
| H  | 0.99727000 | -2.72444100 | 2.62005600  |
| H  | 2.78275900 | -4.50662200 | -0.93159300 |
| H  | 0.79753600 | -4.74436400 | 0.85095800  |
| C  | 1.08348700 | -1.57212600 | -4.02207600 |
| C  | 1.71880600 | -2.37028300 | -3.02902200 |
| C  | 3.07780100 | -2.55219000 | -3.43500400 |
| C  | 2.04647900 | -1.22967200 | -4.99740600 |
| C  | 3.26596400 | -1.85005100 | -4.64479800 |
| H  | 0.05003700 | -1.24415600 | -4.01525400 |
| H  | 1.16502000 | -3.01191200 | -2.30721500 |
| H  | 3.82731200 | -3.13370900 | -2.90647600 |
| H  | 1.87497600 | -0.59145500 | -5.85646200 |
| H  | 4.20171000 | -1.76926000 | -5.19063100 |
| Zr | 2.77580100 | -0.15475300 | -2.76732800 |
| C  | 4.55843000 | 0.37661800  | -1.05420400 |
| C  | 5.21180600 | -0.23843900 | -2.15101900 |
| C  | 5.11785700 | 0.63944000  | -3.26102700 |
| C  | 4.05111600 | 1.62527100  | -1.49482200 |
| C  | 4.40785600 | 1.79278000  | -2.85400200 |
| H  | 4.47499700 | -0.02873100 | -0.05096500 |
| H  | 5.71722200 | -1.20062400 | -2.14182600 |
| H  | 5.51446400 | 0.45676400  | -4.25567100 |
| H  | 3.47186500 | 2.32733400  | -0.90442000 |
| H  | 4.15189100 | 2.64043600  | -3.47807600 |

### Complex 12 triplet to singlet MECP

E (M06/BS1) = -867.6275392

|    |             |             |             |
|----|-------------|-------------|-------------|
| C  | -0.37041800 | -0.01421600 | -1.44595100 |
| C  | 0.91733700  | 0.56653500  | -1.26651100 |
| C  | 1.18311800  | 0.58415400  | 0.13824800  |
| C  | -0.87028000 | -0.38447000 | -0.17806000 |
| C  | 0.08048300  | 0.00126000  | 0.79537300  |
| H  | -0.87073800 | -0.17952500 | -2.39376600 |
| H  | 1.39942000  | 1.21274200  | -2.03540300 |
| H  | 2.07846800  | 0.97919000  | 0.60987200  |
| H  | -1.81387200 | -0.88390500 | 0.00803900  |
| H  | -0.00569100 | -0.15667900 | 1.86697100  |
| Zr | 1.22327200  | -1.81518900 | -0.63981700 |
| C  | 3.43535100  | -2.74007400 | 0.14856800  |
| C  | 2.80732600  | -2.14775300 | 1.27192100  |
| C  | 1.65129100  | -2.91201600 | 1.57787700  |
| C  | 2.65774400  | -3.85911200 | -0.24503400 |
| C  | 1.56433900  | -3.97340600 | 0.64664100  |
| H  | 4.35410900  | -2.40086900 | -0.32252700 |
| H  | 3.15327400  | -1.27064300 | 1.81167400  |
| H  | 0.94830000  | -2.71414400 | 2.38189100  |
| H  | 2.85178400  | -4.50842200 | -1.09210300 |
| H  | 0.78327900  | -4.72270700 | 0.60028500  |
| C  | 1.25617900  | -1.48311900 | -3.94133500 |
| C  | 1.80813600  | -2.21979100 | -2.81641600 |
| C  | 3.15348000  | -2.51503400 | -3.26594300 |
| C  | 2.20687700  | -1.34894200 | -4.98943700 |
| C  | 3.39114900  | -1.99030300 | -4.56822600 |
| H  | 0.23396200  | -1.11573100 | -4.00018100 |
| H  | -0.24871200 | -2.92955300 | -0.96998100 |
| H  | 3.89963600  | -3.05771100 | -2.68692700 |
| H  | 2.05761300  | -0.84469400 | -5.94181000 |
| H  | 4.31638000  | -2.05951900 | -5.13610100 |
| Zr | 2.98625800  | -0.17314400 | -2.90948900 |
| C  | 4.63711700  | 0.52262500  | -1.16736200 |
| C  | 5.33427500  | -0.12470400 | -2.22854100 |
| C  | 5.25909300  | 0.70850800  | -3.38228700 |

|   |            |             |             |
|---|------------|-------------|-------------|
| C | 4.11621300 | 1.73772300  | -1.68270500 |
| C | 4.50635100 | 1.85790300  | -3.04081200 |
| H | 4.54514100 | 0.16454400  | -0.14618900 |
| H | 5.87308100 | -1.06556900 | -2.16210600 |
| H | 5.71615700 | 0.50782300  | -4.34644800 |
| H | 3.52648500 | 2.46410600  | -1.12922600 |
| H | 4.25990600 | 2.68125700  | -3.70545000 |

## TS12-13

M06/BS1:

|                                              |                |             |                    |
|----------------------------------------------|----------------|-------------|--------------------|
| E(RM06) =                                    | -867.609365736 |             |                    |
| Zero-point correction=                       |                | 0.324496    | (Hartree/Particle) |
| Thermal correction to Energy=                |                | 0.344418    |                    |
| Thermal correction to Enthalpy=              |                | 0.345362    |                    |
| Thermal correction to Gibbs Free Energy=     |                | 0.277136    |                    |
| Sum of electronic and zero-point Energies=   |                | -867.284870 |                    |
| Sum of electronic and thermal Energies=      |                | -867.264948 |                    |
| Sum of electronic and thermal Enthalpies=    |                | -867.264004 |                    |
| Sum of electronic and thermal Free Energies= |                | -867.332230 |                    |

E(RM06/BS2) = -867.878190836

|    |             |             |             |
|----|-------------|-------------|-------------|
| C  | -0.21081200 | -0.07259400 | -1.35792200 |
| C  | 1.15224700  | 0.43211500  | -1.31051900 |
| C  | 1.40960900  | 0.53049000  | 0.10755300  |
| C  | -0.73395600 | -0.23939100 | -0.05615100 |
| C  | 0.27930600  | 0.11420500  | 0.86468800  |
| H  | -0.78191800 | -0.25167400 | -2.26291600 |
| H  | 2.22886300  | 1.18861300  | -4.29030200 |
| H  | 2.33982300  | 0.87632500  | 0.55681800  |
| H  | -1.73033000 | -0.59497500 | 0.19859200  |
| H  | 0.19882200  | 0.08550000  | 1.94888200  |
| Zr | 1.23567100  | -1.82072200 | -0.41661600 |
| C  | 3.35529900  | -2.98794400 | 0.32657300  |
| C  | 2.73773900  | -2.37677700 | 1.45097200  |
| C  | 1.51168000  | -3.06155700 | 1.69680800  |
| C  | 2.51172800  | -4.02395600 | -0.13005700 |
| C  | 1.37554900  | -4.07816100 | 0.71373300  |
| H  | 4.30544400  | -2.69796400 | -0.11453100 |
| H  | 3.14418600  | -1.56245200 | 2.04384900  |
| H  | 0.81804100  | -2.85613700 | 2.50696100  |
| H  | 2.68202600  | -4.64728600 | -1.00249800 |
| H  | 0.54936300  | -4.77582800 | 0.61724600  |
| C  | 1.15412100  | -1.53099500 | -3.83159600 |
| C  | 1.79695300  | -2.13227300 | -2.69668700 |
| C  | 3.14278500  | -2.38452100 | -3.14372600 |
| C  | 2.06773500  | -1.41024500 | -4.90847600 |
| C  | 3.29933700  | -1.93966400 | -4.48737200 |
| H  | 0.12138800  | -1.19878500 | -3.86266600 |
| H  | 0.72060800  | -2.83326900 | -1.96280100 |
| H  | 3.92939800  | -2.83402600 | -2.54244100 |
| H  | 1.85399700  | -0.96896200 | -5.87582100 |
| H  | 4.21149100  | -1.98898300 | -5.07713300 |
| Zr | 2.78091000  | 0.03563900  | -2.91910600 |
| C  | 4.53918000  | 0.57956500  | -1.17769400 |
| C  | 5.21996900  | -0.02902400 | -2.25930300 |
| C  | 5.12840800  | 0.83774000  | -3.37494300 |
| C  | 4.03552200  | 1.82830800  | -1.62480900 |
| C  | 4.40727200  | 1.99161700  | -2.97850900 |
| H  | 4.44807900  | 0.17362200  | -0.17326300 |
| H  | 5.72360800  | -0.99110000 | -2.23920400 |
| H  | 5.53299900  | 0.65112700  | -4.36543500 |
| H  | 3.44696500  | 2.52713300  | -1.03914600 |
| H  | 4.15706600  | 2.83418900  | -3.61231800 |

## Complex 13

M06/BS1:

E(RM06) = -867.659697720  
Zero-point correction= 0.325981 (Hartree/Particle)  
Thermal correction to Energy= 0.346263  
Thermal correction to Enthalpy= 0.347207  
Thermal correction to Gibbs Free Energy= 0.278248  
Sum of electronic and zero-point Energies= -867.333717  
Sum of electronic and thermal Energies= -867.313435  
Sum of electronic and thermal Enthalpies= -867.312491  
Sum of electronic and thermal Free Energies= -867.381450  
E(RM06/BS2) = -867.927580267

|    |             |             |             |
|----|-------------|-------------|-------------|
| C  | 0.06732200  | 0.12084100  | -1.30952400 |
| C  | 1.47994600  | 0.33864100  | -1.19901800 |
| C  | 1.73627000  | 0.27634600  | 0.20667700  |
| C  | -0.51832300 | -0.02138400 | -0.02763100 |
| C  | 0.52416200  | 0.05488500  | 0.92050800  |
| H  | -0.48959400 | 0.05294200  | -2.24267100 |
| H  | 2.04317000  | 1.06354100  | -4.38013300 |
| H  | 2.71481500  | 0.38127100  | 0.67506900  |
| H  | -1.56906000 | -0.19319400 | 0.18331500  |
| H  | 0.41616200  | -0.03364500 | 1.99900400  |
| Zr | 1.05443900  | -1.99372700 | -0.45450800 |
| C  | 3.06989400  | -3.06616800 | 0.57993800  |
| C  | 2.24811000  | -2.66621800 | 1.66114500  |
| C  | 1.06310200  | -3.43560600 | 1.61688200  |
| C  | 2.40139300  | -4.10768000 | -0.11571000 |
| C  | 1.16153500  | -4.33273200 | 0.52318500  |
| H  | 4.04374700  | -2.65036400 | 0.33398900  |
| H  | 2.47717400  | -1.88692400 | 2.38192400  |
| H  | 0.21507100  | -3.34658600 | 2.28957200  |
| H  | 2.76537200  | -4.61807000 | -1.00103500 |
| H  | 0.40102800  | -5.04222500 | 0.21661300  |
| C  | 1.36244000  | -1.73298700 | -3.72220000 |
| C  | 2.02163500  | -2.18471200 | -2.53255600 |
| C  | 3.39503700  | -2.30476000 | -2.91620300 |
| C  | 2.28283600  | -1.62575700 | -4.79425000 |
| C  | 3.55631800  | -1.96357600 | -4.28896500 |
| H  | 0.30597900  | -1.48251800 | -3.80149400 |
| H  | -0.68560300 | -2.67013500 | -0.66230300 |
| H  | 4.21009900  | -2.61368900 | -2.26136700 |
| H  | 2.05505000  | -1.30960000 | -5.80726000 |
| H  | 4.48828100  | -1.96430300 | -4.84957600 |
| Zr | 2.88186100  | 0.09826900  | -3.00397700 |
| C  | 4.81224200  | 0.78940300  | -1.54837500 |
| C  | 5.38067300  | 0.35472400  | -2.76902600 |
| C  | 4.98021900  | 1.25602000  | -3.78260400 |
| C  | 4.08057600  | 1.97858400  | -1.80476100 |
| C  | 4.18484100  | 2.26647100  | -3.18425500 |
| H  | 4.92551500  | 0.30100900  | -0.58390300 |
| H  | 5.99530800  | -0.52987500 | -2.90702400 |
| H  | 5.22263100  | 1.18039700  | -4.83868200 |
| H  | 3.51592800  | 2.54692500  | -1.07318500 |
| H  | 3.71507000  | 3.09358800  | -3.70441200 |

## Complex 14

M06/BS1:

E(RM06) = -867.653982558  
Zero-point correction= 0.327281 (Hartree/Particle)  
Thermal correction to Energy= 0.347146  
Thermal correction to Enthalpy= 0.348090  
Thermal correction to Gibbs Free Energy= 0.279389  
Sum of electronic and zero-point Energies= -867.326702



Sum of electronic and thermal Energies= -867.306836  
 Sum of electronic and thermal Enthalpies= -867.305892  
 Sum of electronic and thermal Free Energies= -867.374594  
 E(RM06/BS2) = -867.922469698

|    |             |             |             |
|----|-------------|-------------|-------------|
| C  | 1.57925600  | 0.42975000  | 0.33257600  |
| C  | 2.83663400  | 0.15515000  | -0.31404500 |
| C  | 3.56223900  | -0.59482700 | 0.66475400  |
| C  | 1.50950200  | -0.20706800 | 1.58993900  |
| C  | 2.75096900  | -0.86617100 | 1.79774800  |
| H  | 0.75203300  | 0.96408400  | -0.13409400 |
| H  | 1.37141000  | -0.50419200 | -3.79191600 |
| H  | 4.55619200  | -1.01630800 | 0.53331000  |
| H  | 0.66423500  | -0.20769500 | 2.27479000  |
| H  | 3.03545700  | -1.42467300 | 2.68675100  |
| Zr | 1.76497900  | -1.95491500 | -0.24500600 |
| C  | 1.18249900  | -4.24952100 | 0.62585900  |
| C  | 0.22380900  | -3.37037700 | 1.18424900  |
| C  | -0.56249900 | -2.85347700 | 0.12689700  |
| C  | 0.97000400  | -4.29817300 | -0.77770900 |
| C  | -0.10849200 | -3.43708800 | -1.08526900 |
| H  | 1.94455200  | -4.79653900 | 1.17418500  |
| H  | 0.12988200  | -3.11418900 | 2.23559600  |
| H  | -1.37237700 | -2.13587700 | 0.22380900  |
| H  | 1.55163400  | -4.87797300 | -1.48650600 |
| H  | -0.50606200 | -3.23296200 | -2.07456200 |
| C  | 2.85827000  | -2.63390000 | -3.15194200 |
| C  | 3.36110900  | -2.38917400 | -1.82575400 |
| C  | 4.61881600  | -1.72020500 | -2.05417500 |
| C  | 3.72552000  | -2.08987500 | -4.12125200 |
| C  | 4.83898800  | -1.54409400 | -3.43549800 |
| H  | 1.89732100  | -3.08307800 | -3.39192700 |
| H  | 1.06710000  | -0.97721300 | -1.78208100 |
| H  | 5.30096800  | -1.36470200 | -1.28621800 |
| H  | 3.56277100  | -2.08137000 | -5.19578600 |
| H  | 5.69912100  | -1.06397800 | -3.89654600 |
| Zr | 2.85079500  | -0.13949800 | -2.70375500 |
| C  | 3.45035400  | 2.31557000  | -2.35405100 |
| C  | 4.40941300  | 1.75532300  | -3.22287700 |
| C  | 3.75110600  | 1.41842600  | -4.44224300 |
| C  | 2.19459100  | 2.28836000  | -3.01013500 |
| C  | 2.38784100  | 1.76542000  | -4.31484700 |
| H  | 3.63037000  | 2.65764600  | -1.34142700 |
| H  | 5.46531800  | 1.62016400  | -3.00727900 |
| H  | 4.21708200  | 0.97789100  | -5.31923100 |
| H  | 1.24972300  | 2.62921300  | -2.59612000 |
| H  | 1.62024000  | 1.62953700  | -5.06700000 |

## Complex 15

M06/BS1:

E(UM06) = -867.614353679  
 Zero-point correction= 0.327668 (Hartree/Particle)  
 Thermal correction to Energy= 0.348670  
 Thermal correction to Enthalpy= 0.349614  
 Thermal correction to Gibbs Free Energy= 0.276276  
 Sum of electronic and zero-point Energies= -867.286686  
 Sum of electronic and thermal Energies= -867.265684  
 Sum of electronic and thermal Enthalpies= -867.264740  
 Sum of electronic and thermal Free Energies= -867.338078  
 E(UM06/BS2) = -867.887404604

|   |            |             |             |
|---|------------|-------------|-------------|
| C | 1.25231500 | 0.23642300  | 0.13487100  |
| C | 2.55615300 | 0.12845400  | -0.47495100 |
| C | 3.38969500 | -0.39012700 | 0.56626500  |
| C | 1.30054700 | -0.23704600 | 1.47353300  |
| C | 2.63354500 | -0.63861600 | 1.73967200  |

|    |             |             |             |
|----|-------------|-------------|-------------|
| H  | 0.35855000  | 0.62354200  | -0.35527800 |
| H  | 0.90916600  | -0.09464600 | -3.40516400 |
| H  | 4.44286100  | -0.64398400 | 0.45694200  |
| H  | 0.46744000  | -0.29479500 | 2.17099300  |
| H  | 3.00521000  | -1.04149900 | 2.67861200  |
| Zr | 1.78261800  | -2.12423000 | -0.12447600 |
| C  | 1.40327800  | -4.41143000 | 0.81065000  |
| C  | 0.42018800  | -3.58169400 | 1.40961000  |
| C  | -0.47302400 | -3.14628700 | 0.39996800  |
| C  | 1.10145600  | -4.49548000 | -0.57786400 |
| C  | -0.05502500 | -3.71702200 | -0.82708300 |
| H  | 2.21491200  | -4.91748200 | 1.32316900  |
| H  | 0.37490000  | -3.30572000 | 2.45956500  |
| H  | -1.32432600 | -2.48653300 | 0.54028000  |
| H  | 1.67209800  | -5.04334400 | -1.32082900 |
| H  | -0.53643600 | -3.57520400 | -1.79094900 |
| C  | 2.59367000  | -2.46961000 | -3.26623100 |
| C  | 3.16554200  | -2.38054200 | -1.95250400 |
| C  | 4.48546400  | -1.85129000 | -2.18510200 |
| C  | 3.50178300  | -2.00810000 | -4.25072200 |
| C  | 4.69300500  | -1.63738500 | -3.57571100 |
| H  | 1.57724800  | -2.80386700 | -3.48236900 |
| H  | 0.78120100  | -0.19318700 | -2.63540800 |
| H  | 5.23292800  | -1.66720100 | -1.41666400 |
| H  | 3.32529100  | -1.95285100 | -5.32233100 |
| H  | 5.60225800  | -1.26746100 | -4.04405600 |
| Zr | 2.99348000  | -0.03076900 | -2.76483400 |
| C  | 3.62048500  | 2.38720600  | -2.29298100 |
| C  | 4.67596900  | 1.79987100  | -3.02692900 |
| C  | 4.18533700  | 1.48555000  | -4.32671100 |
| C  | 2.47037100  | 2.40200200  | -3.11342400 |
| C  | 2.81966100  | 1.85443100  | -4.38478400 |
| H  | 3.66520500  | 2.70905300  | -1.25886100 |
| H  | 5.68733800  | 1.63276400  | -2.66744400 |
| H  | 4.75774800  | 1.03639200  | -5.13272600 |
| H  | 1.49103500  | 2.77216600  | -2.82188000 |
| H  | 2.16903400  | 1.76947400  | -5.24965200 |

### Complex 14 to 15 MECP

E (M06/BS1) = -867.6134118

|    |             |             |             |
|----|-------------|-------------|-------------|
| C  | 1.50242200  | 0.31527800  | 0.22763600  |
| C  | 2.79967100  | 0.08729800  | -0.37014800 |
| C  | 3.55298500  | -0.55357000 | 0.66720400  |
| C  | 1.46938800  | -0.21822500 | 1.54146700  |
| C  | 2.74646200  | -0.76968100 | 1.81307400  |
| H  | 0.66329500  | 0.81067800  | -0.26245500 |
| H  | 0.96892600  | -0.44077100 | -3.29521000 |
| H  | 4.57531100  | -0.91519700 | 0.57750400  |
| H  | 0.61839500  | -0.21832700 | 2.21933200  |
| H  | 3.05157900  | -1.24881200 | 2.73997900  |
| Zr | 1.81148900  | -2.07400200 | -0.14354000 |
| C  | 1.16533000  | -4.32393400 | 0.73229400  |
| C  | 0.20263200  | -3.40755400 | 1.23458300  |
| C  | -0.55020300 | -2.90583900 | 0.14327800  |
| C  | 0.98877300  | -4.39598400 | -0.67744100 |
| C  | -0.06676100 | -3.52561200 | -1.03683300 |
| H  | 1.87934100  | -4.89115700 | 1.32017300  |
| H  | 0.07779800  | -3.12311300 | 2.27560100  |
| H  | -1.35783700 | -2.18175600 | 0.20214900  |
| H  | 1.58194100  | -4.99520400 | -1.36122800 |
| H  | -0.44014500 | -3.35241500 | -2.04309500 |
| C  | 2.80542900  | -2.53938400 | -3.25491100 |
| C  | 3.29070600  | -2.41427300 | -1.90477600 |
| C  | 4.59864700  | -1.82199600 | -2.07471600 |
| C  | 3.73422800  | -2.01854900 | -4.18560500 |

|    |            |             |             |
|----|------------|-------------|-------------|
| C  | 4.86236500 | -1.57699500 | -3.44884400 |
| H  | 1.82371100 | -2.92850600 | -3.52849100 |
| H  | 0.86135600 | -0.56849500 | -2.51672000 |
| H  | 5.29278300 | -1.58839200 | -1.27204900 |
| H  | 3.60995100 | -1.95840000 | -5.26458800 |
| H  | 5.76734300 | -1.14436300 | -3.87123300 |
| Zr | 3.01695400 | -0.10772700 | -2.68768500 |
| C  | 3.52447900 | 2.34980900  | -2.33385800 |
| C  | 4.48978300 | 1.84099700  | -3.23250500 |
| C  | 3.82424500 | 1.48324300  | -4.43955400 |
| C  | 2.25857800 | 2.27022200  | -2.95959800 |
| C  | 2.44596700 | 1.74788300  | -4.27518300 |
| H  | 3.71090700 | 2.68650700  | -1.32054800 |
| H  | 5.55556900 | 1.75170200  | -3.04295200 |
| H  | 4.29262300 | 1.06576700  | -5.32639300 |
| H  | 1.31356100 | 2.57677000  | -2.51984200 |
| H  | 1.67268900 | 1.59949900  | -5.02306200 |

## TS15-16

M06/BS1:

|                                              |                |             |                    |
|----------------------------------------------|----------------|-------------|--------------------|
| E(UM06) =                                    | -867.609605715 |             |                    |
| Zero-point correction=                       |                | 0.326427    | (Hartree/Particle) |
| Thermal correction to Energy=                |                | 0.347094    |                    |
| Thermal correction to Enthalpy=              |                | 0.348039    |                    |
| Thermal correction to Gibbs Free Energy=     |                | 0.276549    |                    |
| Sum of electronic and zero-point Energies=   |                | -867.283178 |                    |
| Sum of electronic and thermal Energies=      |                | -867.262511 |                    |
| Sum of electronic and thermal Enthalpies=    |                | -867.261567 |                    |
| Sum of electronic and thermal Free Energies= |                | -867.333057 |                    |

E(UM06/BS2) = -867.880964945

|    |             |             |             |
|----|-------------|-------------|-------------|
| C  | 1.68911800  | 0.32946800  | 0.30874400  |
| C  | 2.97326300  | 0.07258600  | -0.30381100 |
| C  | 3.70700200  | -0.62644400 | 0.71045400  |
| C  | 1.64178200  | -0.23843200 | 1.60789400  |
| C  | 2.89860000  | -0.84529700 | 1.85622000  |
| H  | 0.86194000  | 0.86078600  | -0.16491500 |
| H  | 0.51076700  | -0.47020500 | -3.42613800 |
| H  | 4.71548900  | -1.01919100 | 0.60134900  |
| H  | 0.79359000  | -0.22799900 | 2.28911800  |
| H  | 3.19097900  | -1.35941900 | 2.76840800  |
| Zr | 1.91717900  | -2.06234400 | -0.12114100 |
| C  | 1.06753700  | -4.29220000 | 0.65735000  |
| C  | 0.16654400  | -3.32452400 | 1.17047400  |
| C  | -0.50599900 | -2.71950700 | 0.07951300  |
| C  | 0.93380600  | -4.29539400 | -0.75894700 |
| C  | -0.03834200 | -3.33030400 | -1.11238300 |
| H  | 1.71942600  | -4.93402700 | 1.24155500  |
| H  | 0.03247100  | -3.07233100 | 2.21868100  |
| H  | -1.25471800 | -1.93511500 | 0.14618700  |
| H  | 1.49841400  | -4.91563400 | -1.44777200 |
| H  | -0.36630200 | -3.08885000 | -2.12043600 |
| C  | 2.85743000  | -2.55821400 | -3.19793300 |
| C  | 3.38178100  | -2.44576900 | -1.85598100 |
| C  | 4.68948000  | -1.85716500 | -2.05592400 |
| C  | 3.76815500  | -2.03710600 | -4.14465300 |
| C  | 4.91538700  | -1.60163000 | -3.43386000 |
| H  | 1.87108200  | -2.94788200 | -3.45257500 |
| H  | 0.59846200  | -0.59886500 | -2.67587100 |
| H  | 5.40709700  | -1.63516400 | -1.27083500 |
| H  | 3.61666700  | -1.96384900 | -5.21952700 |
| H  | 5.80854100  | -1.16376500 | -3.87453900 |
| Zr | 3.07246300  | -0.15540200 | -2.60758600 |
| C  | 3.25085600  | 2.37091800  | -2.33796000 |
| C  | 4.34762700  | 1.93763600  | -3.12305200 |
| C  | 3.83678300  | 1.44916600  | -4.35717500 |

|   |            |            |             |
|---|------------|------------|-------------|
| C | 2.06626900 | 2.11785300 | -3.06225400 |
| C | 2.42422600 | 1.54890200 | -4.32042300 |
| H | 3.30885100 | 2.77121300 | -1.33194600 |
| H | 5.39429400 | 1.98429400 | -2.83695600 |
| H | 4.42722100 | 1.05568900 | -5.17956200 |
| H | 1.05562400 | 2.32586600 | -2.72053300 |
| H | 1.74183100 | 1.27507700 | -5.12004900 |

## Complex 16

M06/BS1:

|                                              |                |             |                    |
|----------------------------------------------|----------------|-------------|--------------------|
| E(UM06) =                                    | -867.615744954 |             |                    |
| Zero-point correction=                       |                | 0.328526    | (Hartree/Particle) |
| Thermal correction to Energy=                |                | 0.349678    |                    |
| Thermal correction to Enthalpy=              |                | 0.350622    |                    |
| Thermal correction to Gibbs Free Energy=     |                | 0.278817    |                    |
| Sum of electronic and zero-point Energies=   |                | -867.287219 |                    |
| Sum of electronic and thermal Energies=      |                | -867.266067 |                    |
| Sum of electronic and thermal Enthalpies=    |                | -867.265123 |                    |
| Sum of electronic and thermal Free Energies= |                | -867.336928 |                    |
| E(UM06/BS2) =                                | -867.885705465 |             |                    |

|    |             |             |             |
|----|-------------|-------------|-------------|
| C  | 2.09293200  | 0.42809600  | 0.42512600  |
| C  | 3.36851100  | 0.03394400  | -0.13894100 |
| C  | 3.92116300  | -0.84762300 | 0.86172100  |
| C  | 1.88145900  | -0.20591700 | 1.67377800  |
| C  | 3.01715600  | -1.00846100 | 1.94403400  |
| H  | 1.37731200  | 1.09572100  | -0.05503300 |
| H  | -0.58292800 | -0.41585900 | -3.65047600 |
| H  | 4.87803900  | -1.35872400 | 0.78841500  |
| H  | 1.00000900  | -0.11716900 | 2.30506900  |
| H  | 3.17046500  | -1.61683900 | 2.83246900  |
| Zr | 2.00976300  | -1.94109900 | -0.16574600 |
| C  | 0.91098200  | -4.10457600 | 0.50188700  |
| C  | 0.06070700  | -3.05988000 | 0.94859100  |
| C  | -0.45315200 | -2.39118200 | -0.19171200 |
| C  | 0.90133100  | -4.09658600 | -0.91776300 |
| C  | 0.05983800  | -3.04548700 | -1.34589500 |
| H  | 1.46257800  | -4.79565100 | 1.13257500  |
| H  | -0.14191900 | -2.80229900 | 1.98423300  |
| H  | -1.13462900 | -1.54467500 | -0.18481300 |
| H  | 1.46986000  | -4.76038900 | -1.56062800 |
| H  | -0.15564000 | -2.77806600 | -2.37645800 |
| C  | 3.04838200  | -2.45181200 | -3.17509400 |
| C  | 3.52325800  | -2.48649600 | -1.80686200 |
| C  | 4.90157300  | -2.07770000 | -1.92022100 |
| C  | 4.07307900  | -2.01587200 | -4.05097100 |
| C  | 5.22843800  | -1.77278700 | -3.26851300 |
| H  | 2.03219500  | -2.69202700 | -3.48924500 |
| H  | -0.44979700 | -0.52792200 | -2.92250700 |
| H  | 5.59471900  | -1.96853900 | -1.08971800 |
| H  | 3.98805900  | -1.86971900 | -5.12557400 |
| H  | 6.19192600  | -1.43511200 | -3.64345900 |
| Zr | 3.48512900  | -0.17198100 | -2.41922500 |
| C  | 2.91356700  | 2.29643600  | -2.34303500 |
| C  | 3.99860500  | 2.15712300  | -3.24853900 |
| C  | 3.53975400  | 1.41645500  | -4.36682400 |
| C  | 1.79159900  | 1.63701600  | -2.89484600 |
| C  | 2.18075600  | 1.07787100  | -4.14321500 |
| H  | 2.95144300  | 2.79618600  | -1.38076600 |
| H  | 4.99914800  | 2.55716100  | -3.11194800 |
| H  | 4.13274000  | 1.13538700  | -5.23260800 |
| H  | 0.80962800  | 1.55131900  | -2.43815300 |
| H  | 1.54713600  | 0.50265500  | -4.81290000 |

## Complex 17 triplet

M06/BS1:

E(UM06) = -866.445038115  
Zero-point correction= 0.311259 (Hartree/Particle)  
Thermal correction to Energy= 0.330952  
Thermal correction to Enthalpy= 0.331896  
Thermal correction to Gibbs Free Energy= 0.262392  
Sum of electronic and zero-point Energies= -866.133780  
Sum of electronic and thermal Energies= -866.114086  
Sum of electronic and thermal Enthalpies= -866.113142  
Sum of electronic and thermal Free Energies= -866.182646  
E(UM06/BS2) = -866.711214397

|    |             |             |             |
|----|-------------|-------------|-------------|
| C  | 2.08665700  | 0.41494200  | 0.41206900  |
| C  | 3.37453600  | 0.04358800  | -0.13931900 |
| C  | 3.93436300  | -0.81969200 | 0.87402900  |
| C  | 1.87680500  | -0.21270300 | 1.66494300  |
| C  | 3.02571600  | -0.98965500 | 1.95105900  |
| H  | 1.35870400  | 1.06115400  | -0.07844700 |
| H  | 4.90138000  | -1.31284900 | 0.81406100  |
| H  | 0.98796100  | -0.13674300 | 2.28754900  |
| H  | 3.18464900  | -1.58732500 | 2.84568200  |
| Zr | 2.05153600  | -1.95343100 | -0.16281200 |
| C  | 0.85388900  | -4.11093500 | 0.35218200  |
| C  | 0.04844700  | -3.06208000 | 0.86481800  |
| C  | -0.42538600 | -2.29477100 | -0.23048300 |
| C  | 0.85886100  | -4.00336100 | -1.06391400 |
| C  | 0.06653800  | -2.88971200 | -1.42423500 |
| H  | 1.36858900  | -4.86850700 | 0.93586800  |
| H  | -0.15284300 | -2.86614800 | 1.91425000  |
| H  | -1.06766100 | -1.42077700 | -0.16924200 |
| H  | 1.40270500  | -4.64852000 | -1.74588900 |
| H  | -0.12486700 | -2.53921300 | -2.43476100 |
| C  | 3.14855200  | -2.49089700 | -3.15362100 |
| C  | 3.59577800  | -2.50265000 | -1.77535800 |
| C  | 4.96970500  | -2.07076400 | -1.86735700 |
| C  | 4.18354300  | -2.04819600 | -4.01425900 |
| C  | 5.31872400  | -1.77748700 | -3.21216900 |
| H  | 2.14383200  | -2.75331300 | -3.48537600 |
| H  | 5.64588800  | -1.94257700 | -1.02588500 |
| H  | 4.11776000  | -1.91579800 | -5.09199300 |
| H  | 6.28421700  | -1.42879600 | -3.57162800 |
| Zr | 3.52617800  | -0.19725300 | -2.41911300 |
| C  | 2.80061800  | 2.23243400  | -2.39794200 |
| C  | 3.92738900  | 2.14848900  | -3.25809000 |
| C  | 3.55910500  | 1.36798700  | -4.38269600 |
| C  | 1.74162000  | 1.50244100  | -2.98549100 |
| C  | 2.21325700  | 0.95311200  | -4.20878900 |
| H  | 2.77142200  | 2.74740900  | -1.44347300 |
| H  | 4.89608700  | 2.60930200  | -3.08737100 |
| H  | 4.20053200  | 1.11350400  | -5.22174100 |
| H  | 0.74619200  | 1.36938700  | -2.57072400 |
| H  | 1.63934800  | 0.34016100  | -4.89795300 |

## Complex 17 singlet

M06/BS1:

E(RM06) = -866.454293517  
Zero-point correction= 0.312266 (Hartree/Particle)  
Thermal correction to Energy= 0.331634  
Thermal correction to Enthalpy= 0.332578  
Thermal correction to Gibbs Free Energy= 0.265886  
Sum of electronic and zero-point Energies= -866.142027  
Sum of electronic and thermal Energies= -866.122660  
Sum of electronic and thermal Enthalpies= -866.121715

Sum of electronic and thermal Free Energies= -866.188407  
E(RM06/BS2) = -866.719370290

|    |             |             |             |
|----|-------------|-------------|-------------|
| C  | 2.27666800  | 0.39010700  | 0.59452000  |
| C  | 3.53846600  | 0.03286100  | -0.00741300 |
| C  | 4.10191800  | -0.88358500 | 0.95068100  |
| C  | 2.07549100  | -0.29574100 | 1.81258300  |
| C  | 3.20803600  | -1.11222100 | 2.03834100  |
| H  | 1.53700500  | 1.05159800  | 0.14533400  |
| H  | 5.06239300  | -1.38381100 | 0.85324400  |
| H  | 1.19220900  | -0.24009800 | 2.44557500  |
| H  | 3.38338700  | -1.73851500 | 2.90915400  |
| Zr | 2.23669500  | -1.97189300 | -0.12562200 |
| C  | 0.52783900  | -3.84105800 | 0.03718700  |
| C  | -0.09266500 | -2.69294100 | 0.57597900  |
| C  | -0.23093500 | -1.74144300 | -0.46463400 |
| C  | 0.76721600  | -3.60833700 | -1.34165000 |
| C  | 0.28878400  | -2.30757500 | -1.66091100 |
| H  | 0.79000900  | -4.74039000 | 0.58803500  |
| H  | -0.38325200 | -2.55207600 | 1.61297900  |
| H  | -0.67501800 | -0.75480700 | -0.36218500 |
| H  | 1.23081400  | -4.30823100 | -2.02924500 |
| H  | 0.27572600  | -1.85353200 | -2.64547400 |
| C  | 3.41850900  | -2.58994200 | -3.11467900 |
| C  | 3.80452800  | -2.57941300 | -1.72423600 |
| C  | 5.14880900  | -2.06368400 | -1.76885700 |
| C  | 4.44382100  | -2.07323000 | -3.93654400 |
| C  | 5.52961400  | -1.72223700 | -3.10030500 |
| H  | 2.43898100  | -2.89025600 | -3.48544100 |
| H  | 5.78825800  | -1.89820300 | -0.90516800 |
| H  | 4.39632000  | -1.93251100 | -5.01440100 |
| H  | 6.48877500  | -1.32974800 | -3.42819700 |
| Zr | 3.63366000  | -0.26730300 | -2.30388200 |
| C  | 2.42956700  | 1.94418500  | -2.35999400 |
| C  | 3.43104800  | 2.03606100  | -3.35969400 |
| C  | 3.12496900  | 1.10552500  | -4.37686800 |
| C  | 1.49331500  | 0.95260900  | -2.76065500 |
| C  | 1.93715500  | 0.42799600  | -4.00568900 |
| H  | 2.38995800  | 2.53533300  | -1.45101300 |
| H  | 4.29462700  | 2.69544400  | -3.33908300 |
| H  | 3.71422100  | 0.91887900  | -5.26991300 |
| H  | 0.57966800  | 0.68894700  | -2.23903200 |
| H  | 1.44373900  | -0.34700600 | -4.58644700 |

### Complex 17 triplet to singlet MECP

E (M06/BS1) = -866.4447288

|    |             |             |             |
|----|-------------|-------------|-------------|
| C  | 2.11616200  | 0.42208800  | 0.43010400  |
| C  | 3.40116600  | 0.04528100  | -0.11730700 |
| C  | 3.94712800  | -0.83162200 | 0.88836700  |
| C  | 1.88828300  | -0.22141000 | 1.66986400  |
| C  | 3.02688700  | -1.01617900 | 1.95534100  |
| H  | 1.39594800  | 1.07481600  | -0.06259900 |
| H  | 4.90570900  | -1.34116700 | 0.82337300  |
| H  | 0.99231200  | -0.14763000 | 2.28259500  |
| H  | 3.17231200  | -1.62566400 | 2.84403900  |
| Zr | 2.07085400  | -1.95350600 | -0.16656000 |
| C  | 0.83416900  | -4.09064100 | 0.33228000  |
| C  | 0.03880400  | -3.03636000 | 0.84598400  |
| C  | -0.41642300 | -2.25618400 | -0.24698500 |
| C  | 0.85380300  | -3.97286400 | -1.08282300 |
| C  | 0.07666200  | -2.84611200 | -1.44236900 |
| H  | 1.33943600  | -4.85462900 | 0.91619300  |
| H  | -0.16010900 | -2.84093400 | 1.89581600  |
| H  | -1.04413000 | -1.37178300 | -0.18261700 |
| H  | 1.39089200  | -4.62426200 | -1.76406200 |

|    |             |             |             |
|----|-------------|-------------|-------------|
| H  | -0.10878300 | -2.48975900 | -2.45140400 |
| C  | 3.17710900  | -2.51018600 | -3.14304900 |
| C  | 3.62825300  | -2.51374100 | -1.76870200 |
| C  | 4.99332000  | -2.06221600 | -1.86517600 |
| C  | 4.19695600  | -2.04568800 | -4.00705800 |
| C  | 5.33241400  | -1.75299800 | -3.21058400 |
| H  | 2.17281300  | -2.78141800 | -3.46816600 |
| H  | 5.66668300  | -1.91266100 | -1.02459600 |
| H  | 4.12009200  | -1.90997400 | -5.08383500 |
| H  | 6.29005900  | -1.38945900 | -3.57561600 |
| Zr | 3.53378400  | -0.20131200 | -2.40348000 |
| C  | 2.76827600  | 2.20954000  | -2.39667300 |
| C  | 3.88932100  | 2.14225100  | -3.26536900 |
| C  | 3.52822600  | 1.35081500  | -4.38280100 |
| C  | 1.71648000  | 1.45851300  | -2.97432700 |
| C  | 2.19155200  | 0.91390000  | -4.19829500 |
| H  | 2.73652400  | 2.73366400  | -1.44733300 |
| H  | 4.85427000  | 2.61340200  | -3.09989300 |
| H  | 4.17241400  | 1.09608400  | -5.21980100 |
| H  | 0.72459300  | 1.31474600  | -2.55597300 |
| H  | 1.62610800  | 0.28501700  | -4.88012500 |
